# Supplementary material for: In Silico Analysis Identifies Differently Expressed lncRNAs as Novel Biomarkers for the Prognosis of Thyroid Cancer
Source: Comput Math Methods Med. 2020 Apr 23;2020:3651051. doi: 10.1155/2020/3651051 (PMC7195652; doi:10.1155/2020/3651051)
Supplement: Supplementary Materials — Supplementary table 1: the differently expressed lncRNAs in TC by using GEPIA database. [file 3651051.f1.xlsx]

## Sheet: Sheet1
Gene Symbol	Gene ID	Median (Tumor)	Median (Normal)	Log2(Fold Change)	adjp
RP11-40C6.2	ENSG00000219928.2	993.515	1.89	8.427	6.74e-164
DCSTAMP	ENSG00000164935.6	94.382	0.12	6.412	1.06e-83
XIST	ENSG00000229807.9	108.146	1.16	5.659	7.82e-29
RP5-940J5.9	ENSG00000269968.1	35.554	0	5.192	2.61e-53
SLC22A31	ENSG00000259803.6	39.205	0.53	4.716	2.29e-115
MTND4P12	ENSG00000247627.2	27.624	0.43	4.323	6.46e-36
AC079630.2	ENSG00000223914.1	18.36	0.1	4.137	1.78e-149
RP11-302F12.1	ENSG00000242640.1	12.345	0	3.738	9.99e-59
ARAP1-AS1	ENSG00000256007.1	6.685	0	2.942	4.74e-18
TMSB4XP8	ENSG00000187653.11	6.58	0	2.922	1.16e-06
RP5-890E16.4	ENSG00000266341.1	6.2	0	2.848	4.84e-45
RP11-316M1.12	ENSG00000259357.2	11.94	0.8	2.846	6.93e-56
RP11-667K14.4	ENSG00000262533.1	5.725	0	2.75	4.93e-82
HNRNPCP2	ENSG00000204253.4	15.99	1.65	2.681	1.14e-135
AC079630.4	ENSG00000225342.2	12.54	1.12	2.675	1.18e-94
HMGN1P37	ENSG00000229237.2	4.77	0	2.529	4.42e-105
RP11-474O21.5	ENSG00000272482.1	15.005	1.82	2.505	2e-53
EIF5AP4	ENSG00000234743.1	5.545	0.22	2.423	6.05e-132
CTB-63M22.1	ENSG00000229119.3	213.745	39.871	2.393	1.34e-48
RP11-73M18.2	ENSG00000256500.5	4.13	0	2.359	2.67e-89
RNU4-1	ENSG00000200795.1	4.09	0	2.348	1.21e-05
RP11-476D10.1	ENSG00000260943.1	4.14	0.03	2.319	3e-84
RP11-10G12.1	ENSG00000244538.1	3.935	0	2.303	4.77e-94
FTH1P7	ENSG00000232187.1	32.185	5.75	2.298	6.81e-109
CTD-2619J13.13	ENSG00000268307.1	6.93	0.67	2.247	1.27e-96
FAXC	ENSG00000146267.11	13.575	2.07	2.247	7.63e-117
EVA1A	ENSG00000115363.13	21.88	3.86	2.235	4.26e-52
CTC-518B2.12	ENSG00000268739.1	3.655	0	2.219	8.32e-63
AC018816.3	ENSG00000235978.6	7.18	0.8	2.184	8.92e-116
RMI2	ENSG00000175643.8	9.405	1.29	2.184	4.25e-142
RP1-241P17.4	ENSG00000228532.4	20.044	3.64	2.181	2.28e-46
RP11-498C9.3	ENSG00000262413.1	4.085	0.13	2.17	2.5e-34
CTC-429P9.4	ENSG00000268790.5	7.625	0.94	2.152	1.36e-15
FAM132B	ENSG00000178752.15	26.905	5.58	2.084	1.88e-54
RP11-280O1.2	ENSG00000237463.5	3.62	0.09	2.084	4.84e-69
HMGN1P36	ENSG00000235734.4	3.235	0	2.082	4.75e-86
RP11-60L3.1	ENSG00000259264.5	3.175	0	2.062	1.5e-82
PTCHD4	ENSG00000244694.7	6.265	0.77	2.037	5.64e-126
RP11-649E7.5	ENSG00000258377.1	5.65	0.62	2.037	1.79e-46
XXbac-B33L19.12	ENSG00000278044.1	4.14	0.26	2.028	1.54e-51
ABCC6P2	ENSG00000255277.3	5.91	0.7	2.023	6.08e-172
HSPB1P1	ENSG00000236060.2	5.41	0.6	2.002	9.72e-72
RP11-221N13.3	ENSG00000256268.1	3.29	0.08	1.99	4.39e-121
RP11-173P15.5	ENSG00000256569.1	2.945	0	1.98	3.79e-19
AC009065.4	ENSG00000279473.1	2.91	0	1.967	4.29e-96
RP11-215A21.2	ENSG00000236058.3	4.54	0.42	1.964	1.14e-90
RPS28P7	ENSG00000227097.5	1288.7	344.341	1.901	7.75e-127
RP11-452N17.1	ENSG00000277998.1	34.649	8.78	1.866	4.9e-86
TIMM8AP1	ENSG00000231445.1	2.555	0	1.83	1.35e-87
LINC01314	ENSG00000259417.2	3.52	0.28	1.82	1.27e-67
RPS2P55	ENSG00000216866.5	4.895	0.68	1.811	3.42e-115
CKS1BP3	ENSG00000268942.2	2.48	0	1.799	7.96e-33
PRR36	ENSG00000183248.11	5.74	0.95	1.789	8.95e-101
TRDC	ENSG00000211829.6	5.648	0.93	1.784	7.15e-36
EEF1A1P9	ENSG00000249264.1	3.405	0.28	1.783	2.01e-120
LAMP5	ENSG00000125869.9	3.6	0.34	1.779	1.31e-44
RP11-350J20.12	ENSG00000273132.1	3.515	0.34	1.753	1.22e-73
UNC5B-AS1	ENSG00000237512.6	2.67	0.1	1.738	1.75e-97
FTH1P8	ENSG00000219507.4	14.505	3.67	1.731	3.74e-80
FAM3C2	ENSG00000174028.6	39.175	11.12	1.729	1.55e-31
PPIAP22	ENSG00000198618.5	191.34	57.591	1.715	2.76e-115
RP11-109D20.2	ENSG00000259352.1	2.45	0.07	1.689	1.65e-05
AC007255.8	ENSG00000223813.2	3.725	0.47	1.685	1.57e-51
TENM1	ENSG00000009694.13	5.62	1.06	1.684	2.16e-65
TNRC6C-AS1	ENSG00000204282.4	14.045	3.74	1.666	1.06e-49
RP11-1143G9.4	ENSG00000257764.2	7.06	1.55	1.66	2.2e-25
APOC4-APOC2	ENSG00000224916.8	3.65	0.48	1.652	2.4e-46
ABCC6P1	ENSG00000256340.8	4.365	0.71	1.65	5.21e-130
TBCAP1	ENSG00000226781.1	3.33	0.38	1.65	8.39e-86
RP11-138I1.4	ENSG00000265401.1	237.51	75.792	1.635	2.03e-76
RP11-841O20.2	ENSG00000258757.1	3.015	0.3	1.627	1.69e-28
CTD-3193O13.11	ENSG00000268120.1	4.415	0.76	1.621	1.85e-69
EEF1A1P12	ENSG00000214199.3	3.03	0.32	1.61	8.24e-95
CH507-513H4.5	ENSG00000281383.1	3.765	0.57	1.602	3.39e-60
ABHD11-AS1	ENSG00000225969.1	5.48	1.14	1.598	1.02e-53
FTH1P20	ENSG00000226564.1	13.645	3.84	1.597	4.6e-83
EEF1A1P6	ENSG00000233476.3	42.304	13.35	1.593	1.78e-64
HLA-H	ENSG00000206341.7	54.311	17.33	1.593	1.45e-49
AE000661.37	ENSG00000251002.7	2.085	0.03	1.582	3.42e-51
SNRPGP2	ENSG00000264350.1	17.68	5.26	1.577	2.42e-65
IFNWP19	ENSG00000238271.2	3.28	0.44	1.571	2.03e-59
MIR31HG	ENSG00000171889.3	3.28	0.45	1.562	3.41e-58
DOCK9-AS2	ENSG00000260992.1	16.405	4.91	1.558	1.33e-82
RP11-464D20.2	ENSG00000239246.3	4.555	0.91	1.54	9.22e-77
AF127577.10	ENSG00000229047.1	18.19	5.69	1.52	4.5e-51
MINOS1-NBL1	ENSG00000270136.5	3.14	0.45	1.514	5.52e-47
RPL23AP65	ENSG00000243964.1	5.7	1.35	1.512	5.98e-39
AC239868.2	ENSG00000280874.1	15.37	4.77	1.504	1.2e-16
AC239868.3	ENSG00000281134.1	15.37	4.77	1.504	1.2e-16
HLA-DRB6	ENSG00000229391.7	10.15	2.95	1.497	2.97e-35
SMIM10L2A	ENSG00000178947.8	11.845	3.57	1.491	1.55e-55
RPL41P2	ENSG00000256338.2	111.117	39.01	1.487	1.46e-49
PERM1	ENSG00000187642.9	3.11	0.48	1.474	1.05e-75
SLC25A47P1	ENSG00000254799.1	1.77	0	1.47	1.34e-61
UBE2SP2	ENSG00000224126.2	2.045	0.1	1.469	7.74e-58
SNRPEP2	ENSG00000256968.1	8.21	2.34	1.463	3.07e-54
RP11-386G11.10	ENSG00000258017.1	73.294	26.29	1.445	2.62e-37
RP11-320N7.2	ENSG00000256969.1	1.72	0	1.444	1.08e-113
MISP	ENSG00000099812.8	2.175	0.17	1.44	1.96e-63
MTATP8P1	ENSG00000240409.1	1.71	0	1.438	1.04e-22
ANXA2P2	ENSG00000231991.4	15.455	5.11	1.429	8.2e-38
RP11-44N11.2	ENSG00000272384.1	2.215	0.2	1.422	4.42e-76
RP4-800G7.1	ENSG00000239719.1	1.68	0	1.422	1.03e-21
AL158801.1	ENSG00000279392.1	2.775	0.42	1.411	3.52e-63
PRSS2	ENSG00000275896.4	4.885	1.22	1.406	2.99e-10
AC000089.3	ENSG00000235776.2	3.14	0.57	1.399	2.52e-101
RP11-641D5.1	ENSG00000213178.3	339.707	128.916	1.391	1.7e-91
SMIM1	ENSG00000235169.7	30.085	10.85	1.391	2.24e-99
MIR181A2HG	ENSG00000224020.1	7.165	2.12	1.388	1.97e-64
RP11-547C5.1	ENSG00000257849.1	1.61	0	1.384	1.65e-60
RPL37P6	ENSG00000241431.1	1.565	0	1.359	8.19e-50
RP11-78A19.3	ENSG00000267165.1	30.944	11.56	1.347	7.49e-35
RP11-230G5.2	ENSG00000250748.6	1.535	0	1.342	5.09e-87
LRRC75A	ENSG00000181350.11	7.965	2.55	1.336	1.11e-100
RP11-579D7.2	ENSG00000257653.1	1.52	0	1.333	1.67e-27
LINC00958	ENSG00000251381.6	6.305	1.93	1.318	7.27e-36
UBXN10-AS1	ENSG00000225986.1	5.555	1.65	1.307	1.26e-72
RNF185-AS1	ENSG00000254835.1	8.395	2.81	1.302	1.62e-12
RP11-20J15.3	ENSG00000229116.2	3.025	0.64	1.295	7.82e-34
RP11-7I15.3	ENSG00000254829.1	3.01	0.64	1.29	1.46e-47
RPSAP52	ENSG00000241749.4	1.57	0.06	1.278	1.29e-111
ADTRP	ENSG00000111863.12	2.695	0.53	1.272	2.07e-44
YWHAZP5	ENSG00000213260.3	2.11	0.29	1.27	4.17e-47
NR2F1-AS1	ENSG00000237187.8	17.99	6.9	1.265	5.13e-21
AC007192.6	ENSG00000269145.2	7.045	2.35	1.264	2.1e-49
RP11-805J14.5	ENSG00000254721.1	10.7	3.88	1.262	7.85e-60
PTMAP5	ENSG00000214182.5	11.075	4.05	1.258	8.3e-27
RP11-44N11.3	ENSG00000272043.1	1.39	0	1.257	1.27e-57
AP000275.65	ENSG00000265590.9	5.3	1.66	1.244	9.32e-32
RP11-468E2.1	ENSG00000254692.1	17.385	6.78	1.241	5.38e-29
SOWAHB	ENSG00000186212.3	3.95	1.11	1.23	1.36e-60
RPL7AP30	ENSG00000241741.1	5.455	1.77	1.221	1.89e-92
HNRNPA1P27	ENSG00000233680.4	1.715	0.17	1.214	1.32e-50
RP11-318C24.1	ENSG00000230777.1	1.305	0	1.205	7.78e-05
LINC00853	ENSG00000224805.2	2.405	0.48	1.202	7.73e-112
EEF1A1P5	ENSG00000196205.8	232.131	100.858	1.195	9.2e-17
TRABD2A	ENSG00000186854.10	3.51	0.98	1.188	2.57e-51
RP11-259K15.2	ENSG00000258844.1	2.68	0.62	1.184	3.8e-69
IGKV2D-28	ENSG00000242534.2	1.268	0	1.182	1.32e-05
NAPSB	ENSG00000131401.11	7.825	2.92	1.171	1.03e-10
RP5-875H18.9	ENSG00000276851.1	1.79	0.25	1.158	9.51e-52
AC007283.5	ENSG00000234431.2	4.375	1.41	1.157	1.76e-36
IGHGP	ENSG00000253755.1	2.365	0.51	1.156	4.27e-08
LINC00891	ENSG00000281852.1	3.565	1.05	1.155	8e-46
BRINP1	ENSG00000078725.12	1.825	0.28	1.142	1.11e-55
AC005083.1	ENSG00000233834.6	6.93	2.63	1.127	2.42e-28
CTB-191K22.5	ENSG00000267815.1	51.38	23.051	1.123	1.2e-42
LINC00511	ENSG00000227036.6	1.98	0.38	1.111	1.27e-50
RP11-27G14.4	ENSG00000282221.1	1.945	0.37	1.104	1.67e-81
RP11-256P1.1	ENSG00000249971.1	2.075	0.44	1.094	1.84e-13
AC245100.1	ENSG00000280649.1	5.305	1.96	1.091	3.02e-48
RHNO1	ENSG00000171792.10	26.96	12.15	1.088	2.73e-90
RP11-265N6.1	ENSG00000261684.1	2.585	0.69	1.085	8.2e-31
H2BFS	ENSG00000234289.5	6.005	2.31	1.082	3.68e-55
RP11-259N19.1	ENSG00000272711.1	4.055	1.39	1.081	3.37e-80
NCMAP	ENSG00000184454.6	5.125	1.9	1.079	1.72e-51
RP11-388M20.2	ENSG00000261385.1	2.63	0.72	1.078	7.93e-12
RPS24P8	ENSG00000224094.1	2.565	0.69	1.077	3.36e-70
RPL35P5	ENSG00000225573.4	7.445	3.02	1.071	3.33e-47
RP11-463I20.1	ENSG00000279364.1	38.019	17.6	1.069	6.3e-69
LA16c-380H5.5	ENSG00000272079.2	4.955	1.84	1.068	9.08e-52
RPL35P1	ENSG00000237991.3	2.515	0.68	1.065	5.5e-64
RP11-624M8.1	ENSG00000237742.6	2.155	0.51	1.063	3.71e-40
MKRN2OS	ENSG00000225526.4	2.09	0.48	1.062	1.36e-42
TMSB4X	ENSG00000205542.10	3555.9	1704.58	1.06	2.62e-29
EIF4BP7	ENSG00000225031.1	3.495	1.17	1.051	5.39e-49
AC011737.2	ENSG00000204196.5	35.2	16.48	1.05	3.89e-52
BEAN1	ENSG00000166546.13	4.035	1.47	1.027	1.11e-40
APOC1P1	ENSG00000214855.9	1.275	0.12	1.022	2.18e-36
LINC01315	ENSG00000229891.1	42.084	20.25	1.02	7.76e-28
SMIM14	ENSG00000163683.11	37.165	17.881	1.015	1.15e-50
AC005255.3	ENSG00000256210.3	2.39	0.68	1.013	2.03e-25
HCG22	ENSG00000228789.6	2.125	0.55	1.012	2.37e-31
SUMO1P3	ENSG00000235082.2	4.465	1.71	1.012	3.4e-20
RP11-204C16.4	ENSG00000217624.2	1.395	0.19	1.009	6.85e-39
CERS6-AS1	ENSG00000227617.8	25.96	12.42	1.006	9.85e-49
HACD3	ENSG00000074696.12	69.199	34.099	1	2.05e-40
ANKRD20A8P	ENSG00000229089.6	0.04	1.08	-1	1.29e-97
RP11-20I23.2	ENSG00000279520.1	0.32	1.64	-1	8.52e-112
RP11-568J23.5	ENSG00000270184.1	0.18	1.36	-1	7.46e-114
RP11-666A8.9	ENSG00000267078.1	0.13	1.26	-1	4.9e-98
SPATA25	ENSG00000149634.4	0.64	2.28	-1	1.27e-109
FAM208B	ENSG00000108021.19	9.815	20.649	-1.001	7.56e-92
RP11-666O2.2	ENSG00000275441.1	1.14	3.29	-1.003	1.03e-66
CTAGE8	ENSG00000244693.1	2.775	6.57	-1.004	1e-30
RP11-303E16.8	ENSG00000260643.1	4.285	9.6	-1.004	5.55e-45
RP4-798P15.3	ENSG00000254154.8	0.87	2.75	-1.004	1.84e-57
CTD-2026K11.6	ENSG00000203392.3	0.34	1.69	-1.005	5.86e-83
RP11-206L10.5	ENSG00000240618.1	0.45	1.91	-1.005	6.06e-19
RP11-218F10.3	ENSG00000273449.1	0.385	1.78	-1.005	9.55e-84
SAP30L-AS1	ENSG00000245275.7	0.38	1.77	-1.005	1.14e-115
AC114730.3	ENSG00000224272.2	0.16	1.33	-1.006	7.37e-52
CTD-2382E5.6	ENSG00000278493.1	0.27	1.55	-1.006	1e-49
FLJ33360	ENSG00000250490.1	0.15	1.31	-1.006	4.85e-102
RP11-799B12.4	ENSG00000265750.1	0.2	1.41	-1.006	2.45e-110
RP3-402G11.26	ENSG00000273253.2	1.57	4.16	-1.006	1.81e-55
DSTNP1	ENSG00000230982.1	0.98	2.98	-1.007	1.56e-93
RP11-456O19.3	ENSG00000267732.1	0	1.01	-1.007	8.98e-114
BTN2A3P	ENSG00000124549.14	0.88	2.78	-1.008	1.82e-104
CCT6P3	ENSG00000234585.6	3.48	8.01	-1.008	5.05e-66
RP11-932O9.8	ENSG00000270016.1	0.89	2.8	-1.008	2.56e-79
RP11-523H24.3	ENSG00000226352.2	0.585	2.19	-1.009	7.36e-65
SH3GL1P1	ENSG00000266777.1	0.34	1.7	-1.011	4.64e-98
CTC-338M12.1	ENSG00000248514.1	0.19	1.4	-1.012	3.37e-49
EFCAB12	ENSG00000172771.11	0.87	2.77	-1.012	9.29e-66
AC116614.1	ENSG00000235688.2	0.07	1.16	-1.013	3.31e-74
CTD-2623N2.3	ENSG00000267370.1	0.66	2.35	-1.013	2.26e-107
GCSAM	ENSG00000174500.12	0.69	2.41	-1.013	8.95e-75
MT-ATP8	ENSG00000228253.1	14444.7	29147.8	-1.013	5.82e-20
RP11-384O8.1	ENSG00000267034.1	0.14	1.3	-1.013	6.82e-46
RP11-701H24.5	ENSG00000270704.3	0.63	2.29	-1.013	9.48e-51
WASH3P	ENSG00000185596.16	26.765	55.05	-1.013	3.53e-73
ULK4P1	ENSG00000261279.5	1.075	3.19	-1.014	2.69e-71
AC079807.2	ENSG00000233230.1	1.255	3.56	-1.016	4.88e-106
ORC2	ENSG00000115942.8	7.045	15.27	-1.016	7.98e-113
RP11-104N10.2	ENSG00000274627.1	0.32	1.67	-1.016	2.65e-101
RP11-43F13.1	ENSG00000188002.10	5.295	11.73	-1.016	1.5e-86
RP11-434B12.1	ENSG00000260837.1	0.64	2.32	-1.017	1.1e-105
RP11-981G7.6	ENSG00000272505.1	0.275	1.58	-1.017	2.29e-119
RP13-608F4.5	ENSG00000278603.1	7.34	15.88	-1.017	3.28e-28
RPL23AP1	ENSG00000239257.1	1.98	5.03	-1.017	1.85e-54
SNHG21	ENSG00000250988.7	5.21	11.57	-1.017	1.26e-79
DPY19L2P2	ENSG00000170629.14	0.57	2.18	-1.018	7.82e-83
AC009404.2	ENSG00000236255.1	0.47	1.98	-1.019	8.95e-103
RFX3-AS1	ENSG00000232104.3	0.85	2.75	-1.019	3.84e-86
RP11-1023L17.1	ENSG00000215158.9	1.325	3.71	-1.019	1.66e-88
RP11-482H16.1	ENSG00000271894.1	2.375	5.84	-1.019	1.25e-52
AC018766.6	ENSG00000268047.1	0.08	1.19	-1.02	4.99e-122
CITF22-49E9.3	ENSG00000278869.1	0.42	1.88	-1.02	8.82e-96
RP11-111M22.4	ENSG00000272301.1	0.68	2.41	-1.021	8.95e-59
RP11-244N9.4	ENSG00000231521.1	0	1.03	-1.021	2.42e-64
RP11-286N22.16	ENSG00000279878.1	0.04	1.11	-1.021	3.47e-82
RP4-614O4.13	ENSG00000279253.1	1.78	4.64	-1.021	4.59e-107
ADD3-AS1	ENSG00000203876.9	0.28	1.6	-1.022	2.52e-145
RN7SL834P	ENSG00000243650.3	0.51	2.07	-1.024	2.85e-57
CH507-42P11.8	ENSG00000275993.2	6.335	13.93	-1.025	2.44e-10
ZDHHC8P1	ENSG00000133519.12	0.44	1.93	-1.025	1.28e-75
AC092301.3	ENSG00000269148.1	0.11	1.26	-1.026	1.28e-121
RP11-37B2.1	ENSG00000251136.8	3.415	7.99	-1.026	1.65e-91
CTB-39G8.3	ENSG00000267344.1	0.76	2.59	-1.028	2.12e-53
RP5-965G21.6	ENSG00000276952.1	0.53	2.12	-1.028	1.46e-124
MT-CYB	ENSG00000198727.2	5173.95	10561.3	-1.029	2.88e-22
RBM14-RBM4	ENSG00000248643.5	1.7	4.51	-1.029	1.88e-97
RP11-324I22.4	ENSG00000271335.5	1.25	3.59	-1.029	2.07e-86
RP11-884K10.6	ENSG00000271916.1	0	1.04	-1.029	4.07e-59
RIC1	ENSG00000107036.11	4.93	11.11	-1.03	5.71e-81
RP11-946P6.6	ENSG00000277595.1	0.205	1.46	-1.03	4.13e-94
SNX29P2	ENSG00000271699.5	0.21	1.47	-1.03	4.44e-53
BMS1P2	ENSG00000251079.6	0.345	1.75	-1.032	2.46e-134
CTD-2574D22.3	ENSG00000279789.1	0.32	1.7	-1.032	6.18e-117
TPM3P9	ENSG00000241015.2	1.84	4.81	-1.033	8.12e-121
CFAP221	ENSG00000163075.12	1.3	3.71	-1.034	2.31e-66
ZNF826P	ENSG00000231205.11	4.93	11.14	-1.034	2.11e-53
ADGRA2	ENSG00000020181.17	4.64	10.56	-1.035	7.21e-49
ZSCAN30	ENSG00000186814.12	8.405	18.27	-1.035	1.84e-91
AC000123.4	ENSG00000224138.1	0.58	2.24	-1.036	1.99e-106
BRD9P2	ENSG00000249908.2	0	1.05	-1.036	7.43e-35
LINC01176	ENSG00000281404.1	1.6	4.33	-1.036	3.02e-39
RP11-414C23.1	ENSG00000278847.1	0	1.05	-1.036	5.15e-22
AC007952.5	ENSG00000228157.4	0.35	1.77	-1.037	2.16e-84
INTS6-AS1	ENSG00000236778.7	3.045	7.3	-1.037	2.66e-76
RP11-403P17.6	ENSG00000277978.1	3.98	9.22	-1.037	1.27e-69
CTD-2054N24.2	ENSG00000259363.5	1.59	4.32	-1.039	1.29e-66
RP11-837J7.4	ENSG00000277299.1	0.825	2.75	-1.039	9.88e-60
RP11-307B6.3	ENSG00000223774.5	0.25	1.57	-1.04	1.91e-74
RP4-740C4.5	ENSG00000269896.2	2.35	5.89	-1.04	5.87e-51
RPS20P14	ENSG00000223803.1	0.79	2.68	-1.04	8.13e-52
GUSBP1	ENSG00000183666.16	3.175	7.59	-1.041	6.14e-113
RP11-677M14.7	ENSG00000245498.6	0.57	2.23	-1.041	7.28e-119
ZNF674-AS1	ENSG00000230844.2	2.44	6.08	-1.041	9.63e-117
AC005785.2	ENSG00000268189.2	0.19	1.45	-1.042	7.94e-80
RP11-278C7.3	ENSG00000274105.1	0.34	1.76	-1.042	1.21e-118
RP11-390P2.4	ENSG00000225177.5	1.35	3.84	-1.042	3.88e-79
RP11-449J21.5	ENSG00000267128.1	1.205	3.54	-1.042	1.12e-20
RP11-497H17.1	ENSG00000262663.1	0.15	1.37	-1.043	1.04e-62
SDHAP3	ENSG00000185986.11	1.965	5.11	-1.043	2.66e-62
CEP128	ENSG00000100629.16	2.4	6.01	-1.044	1.29e-91
RP11-159D12.5	ENSG00000266086.1	1.44	4.03	-1.044	1.6e-45
FAM86HP	ENSG00000253540.5	1.2	3.54	-1.045	2.78e-66
IGHE	ENSG00000211891.5	0.1	1.27	-1.045	2.29e-23
MT-ND4L	ENSG00000212907.2	5572.85	11496.4	-1.045	9.13e-18
RP11-37C7.3	ENSG00000261136.1	0.25	1.58	-1.045	8.52e-90
COLCA2	ENSG00000214290.7	4.2	9.74	-1.046	8.21e-44
MOB3B	ENSG00000120162.9	1.91	5.01	-1.046	9.39e-71
TEX41	ENSG00000226674.8	0.55	2.2	-1.046	2.97e-81
CTC-490E21.11	ENSG00000279108.1	1.11	3.36	-1.047	1.19e-57
CTD-3199J23.6	ENSG00000267681.1	1.99	5.18	-1.047	3.01e-54
RP11-311P8.2	ENSG00000232186.1	0.21	1.5	-1.047	1.2e-129
CTB-31O20.2	ENSG00000261526.2	3.11	7.5	-1.048	9.81e-84
LINC01278	ENSG00000235437.7	14.225	30.471	-1.048	8.87e-94
ARRDC1-AS1	ENSG00000203993.4	11.57	25.01	-1.049	6.96e-105
CTD-2349P21.12	ENSG00000276250.1	0.875	2.88	-1.049	8.53e-48
RP11-146F11.1	ENSG00000261840.2	2.02	5.25	-1.049	9.84e-51
DEPTOR	ENSG00000155792.9	17.765	37.851	-1.05	6.69e-43
HIGD1AP11	ENSG00000227644.2	0	1.07	-1.05	2.85e-71
CTC-251I16.1	ENSG00000279496.1	0.53	2.17	-1.051	1.44e-66
RP3-467L1.6	ENSG00000269925.1	0.68	2.48	-1.051	4.67e-80
RP4-742C19.13	ENSG00000279833.1	0.39	1.88	-1.051	7.85e-119
AC137932.4	ENSG00000268218.1	0.225	1.54	-1.052	2.67e-126
SRSF10	ENSG00000188529.14	47.96	100.551	-1.053	6.01e-92
XXbac-BPG157A10.21	ENSG00000272217.1	0.195	1.48	-1.053	3.57e-96
CROCCP2	ENSG00000282056.1	2.68	6.64	-1.054	1.31e-86
RP11-399K21.14	ENSG00000272692.1	0.58	2.28	-1.054	8e-128
CLUHP3	ENSG00000131797.12	7.82	17.34	-1.056	1.46e-86
RN7SL251P	ENSG00000244399.3	0	1.08	-1.057	1.45e-87
RP11-1081L13.4	ENSG00000254966.1	0.62	2.37	-1.057	9.56e-137
RP11-180M15.7	ENSG00000275560.1	0.84	2.83	-1.058	9.24e-60
TRMT10B	ENSG00000165275.9	5.5	12.53	-1.058	3.23e-113
C1orf145	ENSG00000162913.9	1.59	4.4	-1.06	2.05e-56
RP11-463O12.5	ENSG00000280138.1	0.17	1.44	-1.06	6.42e-144
RP11-747H7.3	ENSG00000260711.2	0.18	1.46	-1.06	2.16e-163
CYP4F35P	ENSG00000265787.1	1.215	3.62	-1.061	2.73e-26
CCP110	ENSG00000103540.16	4.24	9.94	-1.062	9.72e-100
RP11-266K4.9	ENSG00000215241.3	0.895	2.96	-1.063	2.69e-67
FAM227A	ENSG00000184949.15	0.55	2.24	-1.064	3.74e-123
RP11-546D6.3	ENSG00000280120.1	2.08	5.44	-1.064	1.7e-93
ZNF137P	ENSG00000123870.10	1.85	4.96	-1.064	1.62e-93
CTD-2033D15.2	ENSG00000276107.1	0.08	1.26	-1.065	6.83e-55
SC22CB-1E7.1	ENSG00000232346.1	0.94	3.06	-1.065	3.02e-54
THAP9-AS1	ENSG00000251022.6	19.885	42.679	-1.065	1.01e-69
COLGALT1	ENSG00000130309.10	13.25	28.839	-1.066	6.64e-63
RP11-2C24.3	ENSG00000280211.1	1.125	3.45	-1.066	1.89e-95
SCARNA15	ENSG00000252690.3	0.49	2.12	-1.066	7.08e-80
HID1-AS1	ENSG00000263586.1	0.27	1.66	-1.067	6.92e-104
RP11-102G14.1	ENSG00000277050.1	0.26	1.64	-1.067	1.49e-93
SCAND2P	ENSG00000176700.19	3.76	8.97	-1.067	1.71e-84
CLMP	ENSG00000166250.11	0.56	2.27	-1.068	3.7e-47
CTD-2027I19.2	ENSG00000268442.1	0.525	2.2	-1.069	7.89e-118
EIF4HP2	ENSG00000237977.1	0.43	2	-1.069	1.29e-92
RP11-394B2.1	ENSG00000279569.1	0.12	1.35	-1.069	3.47e-112
ATP6V0E2-AS1	ENSG00000204934.10	0.71	2.59	-1.07	9.95e-68
RP11-295D4.3	ENSG00000280063.1	0.395	1.93	-1.071	7.66e-103
MSC-AS1	ENSG00000235531.9	0.46	2.07	-1.072	1.65e-85
KANSL1L	ENSG00000144445.15	8.335	18.64	-1.073	7.9e-78
PRDX3P1	ENSG00000229598.1	0.16	1.44	-1.073	8.74e-103
RP11-835E18.4	ENSG00000265188.1	0.06	1.23	-1.073	5.73e-81
CRYBB2P1	ENSG00000100058.12	11.235	24.8	-1.076	2.5e-24
RP11-315O6.1	ENSG00000255337.1	1.135	3.5	-1.076	1.56e-56
AC129492.1	ENSG00000279152.1	0	1.11	-1.077	2.56e-42
CTA-212A2.1	ENSG00000279805.1	0.27	1.68	-1.077	9.7e-141
PALD1	ENSG00000107719.8	3.355	8.19	-1.077	5.21e-63
AC010761.8	ENSG00000264577.1	0.6	2.38	-1.079	1.31e-98
CTD-2521M24.6	ENSG00000269481.1	0.42	2	-1.079	2.12e-136
ANKRD20A5P	ENSG00000186481.15	1.465	4.21	-1.08	5.97e-35
RP11-539G18.3	ENSG00000255458.5	0.4	1.96	-1.08	1.12e-106
LIFR-AS1	ENSG00000244968.6	0.83	2.87	-1.081	9.96e-81
NPIPB6	ENSG00000198156.10	0.55	2.28	-1.081	1.94e-79
RP11-348N5.7	ENSG00000270589.1	1.425	4.13	-1.081	1.16e-46
RP11-346C20.3	ENSG00000271009.2	0.965	3.16	-1.082	1.89e-77
SUDS3P1	ENSG00000249129.1	0.54	2.26	-1.082	2.43e-120
AC010168.1	ENSG00000281457.1	15.765	34.52	-1.083	1.04e-13
RP11-62H7.2	ENSG00000233609.3	0.68	2.56	-1.083	1.52e-43
SRP14-AS1	ENSG00000248508.6	4.84	11.37	-1.083	3.77e-75
AC074212.5	ENSG00000259605.3	12.325	27.249	-1.084	4.57e-35
HCG4P3	ENSG00000237669.1	0.41	1.99	-1.084	5.73e-102
HYPK	ENSG00000242028.5	3.195	7.89	-1.084	3.79e-82
RP11-234G16.4	ENSG00000275327.1	0.09	1.31	-1.084	1.96e-34
AC005682.5	ENSG00000228649.8	0.24	1.63	-1.085	1.72e-134
CTD-2012K14.5	ENSG00000280214.1	0.07	1.27	-1.085	6.91e-135
RP11-629O1.2	ENSG00000261220.2	2.12	5.62	-1.085	3.43e-34
KDM4A-AS1	ENSG00000236200.5	0.945	3.13	-1.086	2.95e-60
MUC3A	ENSG00000169894.17	0.31	1.78	-1.086	9.04e-62
RP4-681N20.5	ENSG00000275582.1	0.37	1.91	-1.087	5.09e-96
SCARNA16	ENSG00000275143.1	0.94	3.12	-1.087	4.28e-13
XX-FW83563B9.5	ENSG00000280195.1	0.69	2.59	-1.087	6.06e-132
RP11-199F11.2	ENSG00000262251.1	0.67	2.55	-1.088	1.43e-110
CEP126	ENSG00000110318.13	1.92	5.21	-1.089	1.79e-114
RP11-728K20.1	ENSG00000224016.2	0.335	1.84	-1.089	2.61e-45
KMT2D	ENSG00000167548.14	15.79	34.731	-1.09	7.23e-71
MT-ND2	ENSG00000198763.3	5303.02	11288	-1.09	2.68e-27
RP11-346C20.4	ENSG00000272250.1	1.5	4.32	-1.09	2.64e-74
AC016722.4	ENSG00000228925.1	0.15	1.45	-1.091	4.04e-148
RP11-445N20.3	ENSG00000273293.1	0	1.13	-1.091	3.93e-22
RP1-193H18.3	ENSG00000267653.1	0	1.13	-1.091	2.01e-76
RP11-160O5.1	ENSG00000263470.1	1.65	4.65	-1.092	1.01e-64
CTC-510F12.3	ENSG00000279807.1	0.115	1.38	-1.094	1.04e-101
CTC-429P9.2	ENSG00000268087.1	1.51	4.36	-1.095	1.24e-78
FAN1	ENSG00000198690.9	6.98	16.04	-1.095	9.66e-92
LINC01372	ENSG00000235475.1	0.55	2.31	-1.095	6.17e-82
PPP3CB-AS1	ENSG00000221817.9	3.195	7.97	-1.096	2.11e-126
SRSF2	ENSG00000161547.14	89.514	192.537	-1.096	4.32e-118
RP11-317B3.2	ENSG00000237593.1	0	1.14	-1.098	1.79e-127
RP11-395N3.1	ENSG00000261379.1	0.06	1.27	-1.099	7.38e-133
MORF4L2-AS1	ENSG00000231154.1	0.18	1.53	-1.1	3.06e-155
RP3-525N10.2	ENSG00000230910.2	1.11	3.53	-1.102	7.68e-15
MTND2P28	ENSG00000225630.1	171.117	368.8	-1.103	9.05e-17
KANSL3	ENSG00000114982.17	14.245	31.76	-1.104	2.67e-117
PIK3IP1-AS1	ENSG00000228839.5	0.47	2.16	-1.104	3.01e-75
RP11-495O11.1	ENSG00000255091.1	0	1.15	-1.104	4.54e-46
RP4-710M3.1	ENSG00000242353.1	0	1.15	-1.104	1.85e-130
CH17-472G23.4	ENSG00000275131.1	0.91	3.11	-1.106	4.3e-97
CTD-2036P10.6	ENSG00000274403.1	0.18	1.54	-1.106	7.22e-108
LINC01573	ENSG00000237886.1	1.275	3.9	-1.107	1.23e-38
RP11-968A15.2	ENSG00000257596.1	0.37	1.95	-1.107	1.49e-96
SNHG15	ENSG00000232956.8	13.485	30.21	-1.107	7.21e-70
ADM5	ENSG00000224420.3	0.35	1.91	-1.108	1.39e-86
HHIP-AS1	ENSG00000248890.1	0.16	1.5	-1.108	2.13e-101
RP4-751H13.5	ENSG00000280149.1	1.57	4.54	-1.108	1.52e-124
GS1-124K5.3	ENSG00000223473.2	0.64	2.54	-1.11	1.25e-118
RP5-894A10.6	ENSG00000270157.1	1.025	3.37	-1.11	5.12e-88
CTA-204B4.2	ENSG00000259891.1	1.87	5.2	-1.111	2.09e-95
RP11-251M1.1	ENSG00000228401.4	0.74	2.76	-1.112	9.32e-76
AC006273.5	ENSG00000267530.2	0.41	2.05	-1.113	6.96e-63
TMEM234	ENSG00000160055.19	19.99	44.399	-1.113	8.76e-72
LLNLF-173C4.1	ENSG00000282051.1	16.91	37.77	-1.114	1.09e-35
MAGI2-AS3	ENSG00000234456.7	15.855	35.481	-1.114	4.64e-76
HIATL2	ENSG00000196312.11	2.56	6.71	-1.115	1.22e-109
RP11-430G17.3	ENSG00000271200.1	0.38	1.99	-1.115	4.06e-64
HSPB2-C11orf52	ENSG00000254445.1	2.165	5.86	-1.116	3.11e-67
UBE2Q2P2	ENSG00000259429.5	0.915	3.15	-1.116	5.92e-97
XXbac-B562F10.11	ENSG00000215493.3	0.31	1.84	-1.116	7.5e-107
GOLGA8H	ENSG00000261794.1	0.305	1.83	-1.117	6.4e-138
RP11-63M22.2	ENSG00000260465.1	5.93	14.03	-1.117	0.000131
RP13-20L14.10	ENSG00000279744.1	0.18	1.56	-1.117	1.35e-124
AC131097.4	ENSG00000216921.7	1.94	5.38	-1.118	1.31e-14
TRMT13	ENSG00000122435.9	5.5	13.11	-1.118	5.75e-113
VIPR1-AS1	ENSG00000232354.7	0.05	1.28	-1.119	6.99e-106
RP11-156E8.1	ENSG00000272195.1	0.38	2	-1.12	2.3e-143
RP11-536K7.3	ENSG00000232807.2	1.11	3.59	-1.121	9.96e-68
RP4-806M20.4	ENSG00000268649.3	0.32	1.87	-1.121	2.39e-77
USP32P2	ENSG00000233327.10	0.37	1.98	-1.121	1.39e-27
CTB-50E14.5	ENSG00000269374.1	1.665	4.8	-1.122	7.34e-93
LLNLR-222A1.1	ENSG00000282798.1	0.19	1.59	-1.122	2.91e-127
AC008993.2	ENSG00000282542.1	0.295	1.82	-1.123	3.28e-125
EPHA5-AS1	ENSG00000250846.6	0	1.18	-1.124	2.02e-74
RP11-203B9.4	ENSG00000226803.7	1.01	3.38	-1.124	8.44e-121
SNHG25	ENSG00000266402.3	0.725	2.76	-1.124	1.1e-35
CAHM	ENSG00000270419.1	0.815	2.96	-1.126	5.14e-102
RP11-206L10.2	ENSG00000228327.2	1.02	3.41	-1.126	1.25e-91
PROX1-AS1	ENSG00000230461.8	0.24	1.71	-1.128	1.9e-61
SCARNA13	ENSG00000252481.1	1.34	4.12	-1.13	9.43e-41
CTD-2651B20.1	ENSG00000259539.1	0.16	1.54	-1.131	1.36e-66
RP11-264B17.2	ENSG00000260853.1	0.575	2.45	-1.131	5.67e-27
AC024937.6	ENSG00000231443.2	0.41	2.09	-1.132	7.58e-95
RP11-93H24.3	ENSG00000273723.1	0.98	3.34	-1.132	2.78e-63
SSC4D	ENSG00000146700.8	1.61	4.72	-1.132	3.08e-22
PWAR5	ENSG00000279192.1	0.955	3.29	-1.134	6.49e-72
MIR600HG	ENSG00000236901.4	1.9	5.37	-1.135	1.78e-107
PRMT9	ENSG00000164169.12	6.835	16.21	-1.135	6.94e-117
LINC01347	ENSG00000214837.8	0.665	2.66	-1.136	2.86e-136
CTD-2235C13.1	ENSG00000242198.1	0.795	2.95	-1.138	1.6e-44
GOLGA8IP	ENSG00000277561.4	0.14	1.51	-1.139	3.01e-97
RP11-173B14.4	ENSG00000228444.2	0.385	2.05	-1.139	2.38e-128
RP11-49K24.3	ENSG00000280212.1	0.18	1.6	-1.14	7.31e-106
AC002066.1	ENSG00000237813.3	0.75	2.86	-1.141	5.24e-51
HNRNPCP7	ENSG00000228653.2	0.71	2.77	-1.141	7.72e-122
TPTE2P5	ENSG00000168852.12	2.26	6.19	-1.141	1.03e-83
RP11-174G6.5	ENSG00000261324.2	0.59	2.51	-1.142	1.47e-100
RP11-468E2.5	ENSG00000259321.1	0.64	2.62	-1.142	1.07e-91
XXbac-BPGBPG55C20.1	ENSG00000272541.1	0.26	1.78	-1.142	1.56e-63
AC083843.4	ENSG00000279518.1	0.665	2.68	-1.144	5.2e-62
BX842568.1	ENSG00000235510.1	0	1.21	-1.144	4.38e-38
LL22NC03-2H8.5	ENSG00000274422.1	0.61	2.56	-1.145	2.81e-105
CECR7	ENSG00000237438.6	0.69	2.74	-1.146	1.47e-44
CTGLF12P	ENSG00000265018.6	0.5	2.32	-1.146	2.07e-56
RP11-216B9.9	ENSG00000280758.1	0.26	1.79	-1.147	1.27e-107
CTD-3128G10.6	ENSG00000269680.1	2.125	5.93	-1.149	2.27e-52
RP11-196G11.2	ENSG00000260911.2	0.38	2.06	-1.149	3.87e-76
SNHG18	ENSG00000250786.1	4.57	11.35	-1.149	1.9e-58
NDUFA6-AS1	ENSG00000237037.9	5.98	14.49	-1.15	1.62e-90
RP11-696N14.1	ENSG00000246090.6	0.37	2.04	-1.15	1.04e-127
GATA6-AS1	ENSG00000266010.1	0.36	2.02	-1.151	4.18e-85
RP11-31F19.1	ENSG00000226403.1	0.4	2.11	-1.151	3.77e-98
RP3-508I15.14	ENSG00000225450.1	0.36	2.02	-1.151	2.25e-114
ERICH6B	ENSG00000165837.11	0.25	1.78	-1.153	4.04e-123
HNRNPA1P16	ENSG00000262333.1	0.83	3.07	-1.153	9.94e-120
RP11-864N7.2	ENSG00000227615.1	2.25	6.23	-1.154	1.56e-67
RP13-895J2.2	ENSG00000256943.1	0.02	1.27	-1.154	3.42e-134
RP11-950C14.3	ENSG00000258646.1	0.15	1.56	-1.155	3.98e-127
AP4B1-AS1	ENSG00000226167.1	0.17	1.61	-1.158	5.37e-133
CTD-3222D19.8	ENSG00000279529.1	0.465	2.27	-1.158	6.56e-84
RP11-1277A3.2	ENSG00000246596.6	0.75	2.91	-1.16	1.05e-114
RP11-701H24.7	ENSG00000271347.1	0.79	3	-1.16	9.42e-61
RP11-798G7.8	ENSG00000266918.1	0.28	1.86	-1.16	4.84e-125
DTX2P1	ENSG00000186704.9	0.9	3.25	-1.161	7.51e-99
RP11-390K5.6	ENSG00000270060.1	0.26	1.82	-1.162	1.36e-104
RP11-264M12.2	ENSG00000261707.1	0.17	1.62	-1.163	1.02e-89
RP13-554M15.2	ENSG00000279700.1	0.21	1.71	-1.163	1.61e-115
AC027601.1	ENSG00000260005.6	0.16	1.6	-1.164	8.87e-147
CTD-2033D15.3	ENSG00000278621.1	0.16	1.6	-1.164	1.07e-65
RP11-73M18.6	ENSG00000270108.1	0.4	2.14	-1.165	5.1e-114
LA16c-361A3.3	ENSG00000261207.1	0.14	1.56	-1.167	7.68e-114
NBPF19	ENSG00000271383.6	3.085	8.18	-1.168	2.63e-106
RP11-112J3.16	ENSG00000227388.2	1.64	4.93	-1.168	5.96e-37
RP11-143K11.7	ENSG00000277728.1	0.335	2	-1.168	6.37e-103
SAPCD1	ENSG00000228727.8	1.185	3.91	-1.168	4.71e-57
AC090044.2	ENSG00000224239.1	0.285	1.89	-1.169	3.07e-61
RP11-467H10.1	ENSG00000213542.3	0.85	3.16	-1.169	5.86e-115
RP11-701H24.3	ENSG00000257647.1	0.61	2.62	-1.169	5.38e-93
ARPC4-TTLL3	ENSG00000250151.9	4.655	11.72	-1.17	1.53e-65
RP11-517C16.2	ENSG00000261286.1	0.08	1.43	-1.17	2.76e-156
DNAJC19P5	ENSG00000225808.1	0.55	2.49	-1.171	2.69e-81
EXOC3L1	ENSG00000179044.15	3.56	9.27	-1.171	2.34e-44
RP11-290F24.6	ENSG00000267940.1	0.425	2.21	-1.172	3.82e-88
RP11-325K4.3	ENSG00000261270.1	0.41	2.18	-1.173	7.61e-99
HOXB-AS1	ENSG00000230148.8	0.67	2.77	-1.175	1.41e-92
RP11-408A13.4	ENSG00000272871.1	0.51	2.41	-1.175	4.53e-118
RP11-471B22.2	ENSG00000258424.1	0.205	1.72	-1.175	4.53e-88
AF230666.2	ENSG00000223697.3	0.43	2.23	-1.176	1.23e-118
CTSLP2	ENSG00000280913.2	0.545	2.49	-1.176	2.79e-109
RP11-802O23.3	ENSG00000272182.1	4.015	10.33	-1.176	5.1e-94
RP11-680G24.6	ENSG00000275910.1	0.37	2.1	-1.178	2.57e-82
AC000123.3	ENSG00000279265.1	1.27	4.14	-1.179	3.17e-99
CTD-3252C9.4	ENSG00000267519.3	6.17	15.25	-1.18	2.29e-32
RP11-396B14.2	ENSG00000263033.2	0.32	1.99	-1.18	1.64e-88
RP5-837J1.6	ENSG00000273687.1	0.32	1.99	-1.18	5.75e-87
SLC25A5P1	ENSG00000215347.3	0.28	1.9	-1.18	7.58e-110
ZNF32-AS2	ENSG00000230565.1	0.32	1.99	-1.18	7.82e-123
CYP4F29P	ENSG00000228314.1	0.42	2.22	-1.181	2.42e-26
RP11-669E14.6	ENSG00000262372.1	0.16	1.63	-1.181	1.32e-87
ZNF736	ENSG00000234444.9	3.49	9.18	-1.181	5.36e-114
XXbac-BPG252P9.9	ENSG00000272540.1	0.79	3.06	-1.182	4.64e-115
LINC00693	ENSG00000228214.6	0.49	2.39	-1.186	2.46e-65
RP11-658F2.8	ENSG00000258297.1	7.23	17.72	-1.186	5.82e-73
RP3-426I6.6	ENSG00000270031.1	0.675	2.81	-1.186	1.09e-81
RP11-386I14.4	ENSG00000273338.1	1.85	5.49	-1.187	3.55e-25
DZANK1	ENSG00000089091.16	2.665	7.35	-1.188	3.67e-111
PDCD6IPP2	ENSG00000261377.5	1.445	4.57	-1.188	9.03e-43
RP11-399K21.13	ENSG00000273248.1	0.33	2.03	-1.188	3.83e-63
TPGS1	ENSG00000141933.9	5.965	14.87	-1.188	7.74e-37
RP11-283I3.2	ENSG00000256577.2	0.285	1.93	-1.189	4.15e-107
RP11-326C3.7	ENSG00000254910.1	0.39	2.17	-1.189	4.66e-73
LINC00685	ENSG00000226179.5	1.49	4.68	-1.19	1.81e-49
LINC01311	ENSG00000260924.2	0.565	2.57	-1.19	2.35e-92
RP11-506M12.1	ENSG00000242798.1	0.17	1.67	-1.19	2.09e-124
SPACA6P	ENSG00000182310.12	11.715	28.019	-1.19	8.5e-35
RP11-420A23.1	ENSG00000251432.6	1.655	5.06	-1.191	3.68e-65
RP11-574K11.29	ENSG00000272140.2	1.01	3.59	-1.191	1.89e-119
RP11-1260E13.4	ENSG00000262061.5	0.16	1.65	-1.192	6.97e-102
RP11-155G14.5	ENSG00000272601.1	0.33	2.04	-1.193	1.6e-80
SZT2	ENSG00000198198.13	8.985	21.83	-1.193	4.07e-120
RP11-168A11.4	ENSG00000251050.1	0.53	2.5	-1.194	1.41e-77
TPT1-AS1	ENSG00000170919.15	15.2	36.061	-1.194	7.27e-75
RP5-1120P11.1	ENSG00000237686.6	1.63	5.02	-1.195	2.2e-79
AC006116.24	ENSG00000267776.1	0.75	3.01	-1.196	2.19e-96
SNHG12	ENSG00000197989.13	18.65	44.029	-1.196	2.89e-50
ENKD1	ENSG00000124074.11	17.225	40.779	-1.197	1.52e-87
RP11-212I21.4	ENSG00000261997.1	0.23	1.82	-1.197	1.3e-99
RP11-1109F11.5	ENSG00000271259.1	1.075	3.76	-1.198	2.52e-52
LINC01197	ENSG00000248441.6	0.96	3.5	-1.199	1.65e-108
RP13-516M14.2	ENSG00000264548.1	0.11	1.55	-1.2	1.59e-123
BMS1P1	ENSG00000204177.10	0.94	3.46	-1.201	3.94e-130
BX322557.10	ENSG00000215447.7	1.81	5.46	-1.201	4.49e-111
GSTT2B	ENSG00000133433.10	7.215	17.9	-1.202	6.82e-33
KB-1440D3.13	ENSG00000272954.1	0.3	1.99	-1.202	3.82e-79
RP4-647C14.3	ENSG00000258944.1	0.39	2.2	-1.203	2.14e-100
RP11-261C10.5	ENSG00000227230.1	0.22	1.81	-1.204	1.79e-115
KIZ	ENSG00000088970.15	12.235	29.51	-1.205	8.15e-107
LINC00930	ENSG00000258647.5	0.21	1.79	-1.205	8.66e-89
RRN3P2	ENSG00000103472.9	0.51	2.48	-1.205	3.28e-110
AP000473.5	ENSG00000228798.1	0.625	2.75	-1.206	3.52e-81
CCM2L	ENSG00000101331.15	3.915	10.35	-1.207	6.88e-49
LINC01481	ENSG00000257815.5	6.15	15.51	-1.207	1.86e-76
RP11-110I1.11	ENSG00000254428.1	0.33	2.07	-1.207	1.46e-96
CTD-2182N23.1	ENSG00000240237.1	235.698	545.675	-1.208	3.73e-23
CTD-2587H24.14	ENSG00000276570.1	1	3.62	-1.208	3.04e-113
EBLN2	ENSG00000255423.1	0.29	1.98	-1.208	1.5e-131
GLUD1P3	ENSG00000250959.2	0.45	2.35	-1.208	3.81e-128
RP11-488L18.10	ENSG00000259865.1	6.495	16.31	-1.208	3.33e-54
XXbac-BPG283O16.9	ENSG00000280128.1	3.89	10.3	-1.208	7.42e-110
MT1L	ENSG00000260549.1	14.95	35.901	-1.21	8.59e-42
RP4-657D16.3	ENSG00000266993.3	0.56	2.61	-1.21	2.07e-123
LINC01057	ENSG00000224081.7	1.34	4.42	-1.212	2.48e-71
RP11-527J8.1	ENSG00000273306.1	0.57	2.64	-1.213	1.58e-133
RP1-283E3.8	ENSG00000268575.1	1.2	4.1	-1.213	2.87e-98
AC005363.9	ENSG00000255513.1	0	1.32	-1.214	2.45e-40
RP11-1000B6.7	ENSG00000276724.1	3.26	8.89	-1.215	1.76e-98
ZNF316	ENSG00000205903.6	14.86	35.829	-1.215	4.65e-104
AC011298.2	ENSG00000219159.4	0.02	1.37	-1.216	5.38e-73
CPED1	ENSG00000106034.17	0.92	3.46	-1.216	1.81e-93
HLA-F-AS1	ENSG00000214922.9	1.44	4.67	-1.216	6.92e-115
AC005042.4	ENSG00000204380.4	0.6	2.72	-1.217	4.52e-74
CTA-363E19.2	ENSG00000272072.1	0.66	2.86	-1.217	9.71e-114
RP11-70D24.2	ENSG00000278058.1	4.435	11.63	-1.217	4.23e-67
SDCBP2-AS1	ENSG00000234684.6	2.135	6.29	-1.217	1.82e-128
AC068491.2	ENSG00000229118.1	0.765	3.11	-1.219	3.99e-42
Metazoa_SRP	ENSG00000277578.1	0.365	2.18	-1.22	1.18e-33
RN7SKP287	ENSG00000252355.1	0	1.33	-1.22	3.23e-84
RP11-81A1.6	ENSG00000278600.1	2.845	7.96	-1.22	1.86e-100
RP11-127B20.3	ENSG00000272677.1	1.025	3.72	-1.221	7.07e-84
RP11-253E3.3	ENSG00000250899.3	0.63	2.8	-1.221	9.46e-133
LINC00854	ENSG00000236383.7	1.225	4.19	-1.222	5.49e-102
RP11-326C3.11	ENSG00000251661.3	0.295	2.02	-1.222	1.75e-126
CRHR1-IT1	ENSG00000204650.13	8.445	21.05	-1.223	1.9e-97
RP11-562A8.4	ENSG00000259298.1	0.37	2.2	-1.224	7.29e-102
C7orf55-LUC7L2	ENSG00000146963.17	49.545	117.197	-1.226	4.3e-111
RP11-1415C14.3	ENSG00000253816.3	6.62	16.82	-1.226	1.09e-57
HLA-J	ENSG00000204622.10	0.88	3.4	-1.227	1.42e-57
SNHG1	ENSG00000255717.6	30.735	73.282	-1.227	4.92e-58
AC006077.3	ENSG00000279799.1	1.31	4.41	-1.228	5.98e-59
SFSWAP	ENSG00000061936.9	15.745	38.231	-1.228	4.83e-108
AC005785.5	ENSG00000279203.1	0.28	2	-1.229	1.74e-99
RP4-758J18.13	ENSG00000272455.1	1.505	4.87	-1.229	5.94e-62
RP11-279O9.4	ENSG00000249679.1	0.33	2.12	-1.23	1.08e-91
RP11-789C17.1	ENSG00000265413.1	0.505	2.53	-1.23	1.79e-94
MIR497HG	ENSG00000267532.3	1.39	4.61	-1.231	3.78e-86
RP11-20O24.4	ENSG00000244716.3	2.535	7.3	-1.231	6.99e-74
AC009120.5	ENSG00000260884.1	0.43	2.36	-1.232	6.84e-110
RP11-500G10.5	ENSG00000277218.1	0.26	1.96	-1.232	3.94e-105
RN7SL663P	ENSG00000275132.1	0	1.35	-1.233	7.16e-76
RP11-68I3.4	ENSG00000264290.1	0.2	1.82	-1.233	8.35e-114
STAG3L2	ENSG00000277072.4	6.425	16.45	-1.233	8.96e-89
CTD-2619J13.14	ENSG00000232098.3	2.835	8.02	-1.234	2.79e-100
RPS2P5	ENSG00000240342.3	63.159	149.914	-1.234	2.79e-26
BCL2L2-PABPN1	ENSG00000258643.5	0.77	3.17	-1.236	3.29e-22
ZBED6	ENSG00000257315.1	1.65	5.24	-1.236	2.18e-75
AP000442.1	ENSG00000255139.1	1.02	3.76	-1.237	8.49e-118
LINC01139	ENSG00000215808.2	0.09	1.57	-1.237	7.97e-08
CATIP-AS1	ENSG00000225062.1	0.94	3.58	-1.239	1.07e-103
RP11-388C12.8	ENSG00000262410.1	0.62	2.83	-1.241	1.89e-104
RP11-578F21.6	ENSG00000261480.1	0.1	1.6	-1.241	1.84e-115
LINC01384	ENSG00000237396.1	0.04	1.46	-1.242	5.43e-92
RP1-102E24.10	ENSG00000276718.1	1.19	4.18	-1.242	3.08e-113
RP11-20I20.4	ENSG00000273179.1	0.26	1.98	-1.242	7.78e-74
AC005306.3	ENSG00000267283.1	0.715	3.06	-1.243	4.18e-43
PARGP1	ENSG00000239883.8	1.31	4.47	-1.244	6.1e-116
RP11-160E2.19	ENSG00000263394.1	0.3	2.08	-1.244	1.42e-80
AC015849.19	ENSG00000270871.1	0.24	1.94	-1.245	1.5e-108
RP11-196G11.4	ENSG00000262766.1	0.59	2.78	-1.249	2.05e-120
RP11-257O5.2	ENSG00000279059.1	2.745	7.9	-1.249	1.25e-105
AC009948.5	ENSG00000223960.6	4.715	12.59	-1.25	3.01e-123
BRINP3	ENSG00000162670.10	0.11	1.64	-1.25	4.64e-113
RP11-390F4.6	ENSG00000236924.1	0.27	2.02	-1.25	7.17e-28
CTBP1-AS	ENSG00000280927.1	0.29	2.07	-1.251	1.04e-135
SULT1A4	ENSG00000213648.10	3.825	10.48	-1.251	2.51e-52
VN1R83P	ENSG00000268521.1	0.745	3.16	-1.253	2.85e-116
bP-21264C1.1	ENSG00000279208.1	0.35	2.22	-1.254	4.46e-51
RP11-263K19.4	ENSG00000231064.5	4.525	12.18	-1.254	1.98e-65
RP11-326C3.16	ENSG00000277290.1	0.3	2.1	-1.254	6.77e-81
RP11-736K20.4	ENSG00000280339.1	0.965	3.69	-1.255	2.23e-118
AC018804.7	ENSG00000213225.7	0.21	1.89	-1.256	7.23e-46
CTC-260F20.3	ENSG00000258674.5	0.96	3.68	-1.256	4.93e-101
KLRAP1	ENSG00000256667.6	0.75	3.18	-1.256	1.75e-109
RP11-73M18.8	ENSG00000269958.1	7.19	18.56	-1.256	5.98e-85
DDX39A	ENSG00000123136.14	26.46	64.619	-1.257	2.5e-100
LINC00641	ENSG00000258441.1	1.695	5.44	-1.257	6.78e-109
PROSER2-AS1	ENSG00000225778.5	0.36	2.25	-1.257	1.78e-62
GABPB1-AS1	ENSG00000244879.4	4.115	11.23	-1.258	1.03e-103
RP11-666A8.12	ENSG00000272386.1	0.48	2.54	-1.258	6.83e-77
SNHG20	ENSG00000234912.9	4.75	12.76	-1.259	8.24e-103
AC009237.8	ENSG00000229689.3	1.92	6	-1.261	4.77e-91
EFCAB13	ENSG00000178852.15	5.965	15.69	-1.261	9e-33
RP11-798M19.6	ENSG00000272870.1	1.845	5.83	-1.263	3.93e-112
RP11-345P4.6	ENSG00000269227.1	0.22	1.93	-1.264	3.39e-81
TMEM262	ENSG00000187066.8	0.37	2.29	-1.264	7.23e-132
AC139100.4	ENSG00000278000.1	0.44	2.46	-1.265	1.07e-96
RP11-146D12.2	ENSG00000240240.8	0.29	2.1	-1.265	6.46e-130
RP11-566K11.4	ENSG00000259006.1	2.12	6.51	-1.267	1.06e-58
RP3-508I15.22	ENSG00000273076.1	0.23	1.96	-1.267	7.67e-120
RP11-430C7.5	ENSG00000240219.1	0.1	1.65	-1.268	3.68e-132
RP5-1024N4.4	ENSG00000272491.1	0.15	1.77	-1.268	5.19e-134
DXO	ENSG00000204348.9	15.845	39.609	-1.269	6.99e-115
RP4-669P10.20	ENSG00000281538.1	0.75	3.22	-1.27	2.13e-95
AC005329.7	ENSG00000248015.6	0.5	2.62	-1.271	7.91e-97
RP11-365N19.2	ENSG00000259515.1	0.21	1.92	-1.271	3.35e-121
RP11-787I22.3	ENSG00000271730.1	0.62	2.91	-1.271	4.35e-104
CTD-2017D11.2	ENSG00000279425.1	0.34	2.24	-1.274	5.16e-136
SRSF6	ENSG00000124193.14	58.391	142.596	-1.274	1.43e-103
GATA2-AS1	ENSG00000244300.2	0.545	2.74	-1.275	1.28e-117
RP11-435O5.4	ENSG00000271659.1	0.26	2.05	-1.275	2.77e-114
FAR2P2	ENSG00000178162.8	2.975	8.63	-1.277	1.05e-61
CTD-3001H11.2	ENSG00000277383.1	0.575	2.82	-1.278	2.28e-79
RP11-574K11.31	ENSG00000272916.5	0.41	2.42	-1.278	1.03e-149
CMB9-55F22.1	ENSG00000279672.1	1.25	4.47	-1.282	1.17e-68
CSPG4P12	ENSG00000259295.6	0.18	1.87	-1.282	4.78e-147
RP11-440L14.4	ENSG00000272588.1	0.48	2.6	-1.282	3.81e-105
RP11-47I22.1	ENSG00000258926.1	0.16	1.82	-1.282	9.82e-100
CH507-396I9.7	ENSG00000277277.2	0.71	3.16	-1.283	3.07e-68
PRMT5-AS1	ENSG00000237054.9	0.2	1.92	-1.283	1.8e-113
CTD-2047H16.4	ENSG00000263069.5	0.815	3.42	-1.284	1.38e-139
RP11-631N16.2	ENSG00000257354.2	2.155	6.68	-1.284	5.16e-69
RP11-834C11.4	ENSG00000250742.1	1.88	6.02	-1.285	3.25e-36
PPP6R2	ENSG00000100239.15	27.825	69.271	-1.286	1.52e-129
RP11-646I6.6	ENSG00000270147.1	0.64	3	-1.286	9.98e-93
CTC-428H11.2	ENSG00000272367.1	0.59	2.88	-1.287	3.19e-122
RP11-727A23.5	ENSG00000247137.8	3.205	9.26	-1.287	4.21e-131
NSMF	ENSG00000165802.19	16.775	42.411	-1.288	4.63e-78
RP5-1160K1.6	ENSG00000228703.1	0.13	1.76	-1.288	2.77e-123
GTF3C2-AS1	ENSG00000234945.7	0.195	1.92	-1.289	6.34e-117
SERTM1	ENSG00000180440.3	0.17	1.86	-1.29	2.64e-26
WASH6P	ENSG00000182484.14	24.685	61.81	-1.29	5.14e-80
CTC-439O9.1	ENSG00000278875.1	0.12	1.74	-1.291	4.09e-152
MTERF2	ENSG00000120832.9	13.04	33.36	-1.291	1.51e-112
RP11-359E3.4	ENSG00000272631.1	0.41	2.45	-1.291	8.13e-172
ALOX12P2	ENSG00000262943.7	3.955	11.13	-1.292	4.74e-44
RP11-783K16.14	ENSG00000256116.1	0.985	3.86	-1.292	4.86e-123
CEP85	ENSG00000130695.13	4.075	11.44	-1.293	1.47e-111
CLHC1	ENSG00000162994.15	3.995	11.24	-1.293	4.05e-97
FLNB-AS1	ENSG00000244161.1	0.22	1.99	-1.293	3.45e-156
RP11-524D16__A.3	ENSG00000261295.1	0.2	1.94	-1.293	5.04e-69
RP11-285F7.2	ENSG00000242861.1	5.965	16.08	-1.294	9.96e-76
RP3-340B19.3	ENSG00000228559.1	2.61	7.85	-1.294	3.44e-77
ST7-AS1	ENSG00000227199.1	1.475	5.08	-1.297	7.82e-120
PGM5P3-AS1	ENSG00000277631.4	0.22	2	-1.298	2.18e-99
AC006547.13	ENSG00000236540.7	1.76	5.79	-1.299	1.25e-114
CTD-2371O3.3	ENSG00000268403.2	1.475	5.1	-1.301	4.13e-74
FERP1	ENSG00000232149.1	0.2	1.96	-1.303	6.52e-110
RMST_9	ENSG00000276398.1	9.755	25.56	-1.304	2.19e-23
RP13-401N8.3	ENSG00000250090.1	2.085	6.62	-1.304	1.06e-38
RP11-443P15.2	ENSG00000171658.8	0.22	2.02	-1.308	3.48e-74
COL6A4P2	ENSG00000228252.8	0.255	2.11	-1.309	3.27e-58
AJ011932.1	ENSG00000274248.1	0.17	1.9	-1.31	4.3e-59
LINC01088	ENSG00000249307.5	0.25	2.1	-1.31	2.06e-74
MYZAP	ENSG00000263155.5	0.895	3.7	-1.31	1.77e-127
RP4-563E14.1	ENSG00000273759.1	1.21	4.48	-1.31	1.41e-67
CTD-2537I9.18	ENSG00000276488.1	0.36	2.38	-1.313	2.99e-129
FKSG63	ENSG00000280252.1	0.17	1.91	-1.314	1.91e-89
METAP1D	ENSG00000172878.13	1.65	5.59	-1.314	5.51e-141
RP11-693N9.2	ENSG00000235505.7	5.1	14.18	-1.315	2.44e-68
RP11-760H22.2	ENSG00000254343.2	3.65	10.58	-1.316	2.18e-64
ATP1A1-AS1	ENSG00000203865.9	3.13	9.29	-1.317	1.02e-107
RP11-1348G14.8	ENSG00000275807.1	0.24	2.09	-1.317	1.39e-111
SNHG14	ENSG00000224078.12	61.194	153.915	-1.317	6.57e-78
RP11-2K6.1	ENSG00000279225.1	0.45	2.62	-1.32	5.91e-58
SNX18P3	ENSG00000225345.3	0.25	2.12	-1.32	7.94e-157
RP11-77H9.2	ENSG00000260276.2	2.175	6.93	-1.321	7.89e-105
RP11-278C7.4	ENSG00000276148.1	1.325	4.83	-1.326	2.33e-76
RP11-503E24.2	ENSG00000254165.1	0.36	2.41	-1.326	7e-136
SSR1P1	ENSG00000220598.1	0.1	1.76	-1.327	1.59e-91
WHAMMP2	ENSG00000248334.6	1.075	4.21	-1.328	1.61e-145
RP11-22B23.1	ENSG00000111788.10	0.74	3.37	-1.329	6.94e-78
RP11-73M7.6	ENSG00000235790.7	0.15	1.89	-1.329	1.6e-131
CTC-542B22.2	ENSG00000263990.1	0.44	2.62	-1.33	1.87e-102
RP11-478C19.2	ENSG00000258210.1	0.26	2.17	-1.331	2.43e-122
SMIM10	ENSG00000184785.5	2.8	8.56	-1.331	1.42e-112
LA16c-380F5.3	ENSG00000280231.1	0.46	2.68	-1.334	5.67e-111
MSTO2P	ENSG00000203761.5	0.92	3.84	-1.334	1.25e-117
IGLV5-52	ENSG00000211643.2	0.51	2.81	-1.335	2.69e-39
AC007038.7	ENSG00000229127.1	0.26	2.18	-1.336	7.02e-166
AP000580.1	ENSG00000219529.2	1.845	6.18	-1.336	2.7e-88
GOLGA8S	ENSG00000261739.2	0.39	2.51	-1.336	3.92e-78
GS1-124K5.2	ENSG00000230189.6	1.195	4.54	-1.336	2.28e-114
LA16c-329F2.1	ENSG00000261399.1	1.405	5.07	-1.336	3.12e-20
RP11-552M11.4	ENSG00000243960.1	0.62	3.09	-1.336	6e-88
RP11-304L19.3	ENSG00000261123.1	0.215	2.07	-1.337	3.13e-126
AC156455.1	ENSG00000256546.1	0.745	3.41	-1.338	6.99e-92
XX-C00717C00720L.1	ENSG00000279182.1	0.25	2.16	-1.338	6.44e-121
RP11-468E2.11	ENSG00000278784.1	2.985	9.08	-1.339	6.14e-114
MTERF4	ENSG00000122085.16	23.175	60.212	-1.34	5.21e-130
TUG1_1	ENSG00000276664.1	5.145	14.56	-1.34	1.14e-14
AC008746.12	ENSG00000267838.2	1.02	4.12	-1.342	2.28e-62
C5orf56	ENSG00000197536.10	7.1	19.53	-1.342	1.69e-123
PQLC2L	ENSG00000174899.10	2.055	6.75	-1.343	2.13e-52
PROSER3	ENSG00000167595.14	5.7	16	-1.343	2.77e-97
XXbac-BPGBPG55C20.2	ENSG00000272316.1	0.87	3.75	-1.345	5.19e-147
RP11-175P13.3	ENSG00000257489.6	1.01	4.11	-1.346	3.62e-111
SOCS2-AS1	ENSG00000246985.7	0.9	3.83	-1.346	3.98e-96
RP11-1391J7.1	ENSG00000250397.2	0.36	2.46	-1.347	2.25e-131
LL21NC02-21A1.1	ENSG00000273796.1	1.4	5.11	-1.348	1.85e-87
HSPA7	ENSG00000225217.1	1.92	6.44	-1.349	1.44e-36
LINC00265	ENSG00000188185.11	2.115	6.94	-1.35	2.26e-86
PWAR6	ENSG00000257151.1	6.585	18.34	-1.35	1.14e-84
RP11-849H4.4	ENSG00000251143.1	0.22	2.11	-1.35	2.83e-151
RP5-1042K10.14	ENSG00000279624.3	0.195	2.05	-1.352	7.99e-117
LINC00924	ENSG00000259134.5	0.48	2.78	-1.353	1.58e-126
CTC-1337H24.4	ENSG00000275484.1	0.81	3.63	-1.355	7.34e-82
RN7SKP70	ENSG00000252464.1	0.91	3.89	-1.356	3.43e-61
RP1-253P7.4	ENSG00000197815.4	0.305	2.34	-1.356	7.64e-143
FAM27E3	ENSG00000274026.1	0.655	3.24	-1.357	6.97e-92
RP11-203J24.9	ENSG00000257524.5	3.61	10.81	-1.357	5.11e-33
RP11-345P4.7	ENSG00000269737.1	0.365	2.5	-1.358	1.27e-100
CDH12P1	ENSG00000254335.1	1.46	5.31	-1.359	6.88e-25
CDH12P3	ENSG00000253492.1	1.46	5.31	-1.359	6.88e-25
FAM86B3P	ENSG00000173295.7	1.995	6.68	-1.359	3.23e-109
RP11-677M14.6	ENSG00000254509.1	0.4	2.59	-1.359	1.75e-105
RP11-164J13.1	ENSG00000258461.5	1.63	5.75	-1.36	5.95e-36
AC026150.8	ENSG00000260693.1	1.69	5.91	-1.361	1.74e-84
KMT2E-AS1	ENSG00000239569.3	2.54	8.09	-1.361	3.99e-100
SMG1P4	ENSG00000185710.9	1.285	4.87	-1.361	7.98e-86
LINC00173	ENSG00000196668.3	0.24	2.19	-1.363	2.86e-79
H19	ENSG00000130600.15	11.875	32.13	-1.364	2.2e-14
RP11-195E2.1	ENSG00000230847.4	0.64	3.22	-1.364	1.73e-29
RP4-545C24.1	ENSG00000244198.5	7.44	20.72	-1.364	3.82e-64
RP11-680A11.5	ENSG00000257605.2	0.77	3.56	-1.365	3.48e-92
TBC1D3L	ENSG00000274512.4	4.78	13.91	-1.367	6.24e-21
LINC00205	ENSG00000223768.1	2.645	8.41	-1.368	2.46e-117
RP11-394I13.2	ENSG00000271151.1	0.27	2.28	-1.369	1.57e-129
RP1-228P16.1	ENSG00000240399.1	0.475	2.81	-1.369	1.08e-93
MAATS1	ENSG00000183833.16	3.88	11.61	-1.37	4.25e-96
RP11-96C23.11	ENSG00000261011.1	0.35	2.49	-1.37	6.96e-95
MCCC1-AS1	ENSG00000243368.2	0.605	3.15	-1.371	2.1e-98
RP11-166N17.1	ENSG00000227253.3	0.28	2.31	-1.371	1.5e-101
NPTN-IT1	ENSG00000281183.1	0.225	2.17	-1.372	1.5e-155
AP006621.9	ENSG00000269915.1	0.12	1.9	-1.373	7.44e-106
CAPN10-AS1	ENSG00000260942.1	0.54	2.99	-1.373	9e-107
FAM219A	ENSG00000164970.14	5.61	16.13	-1.374	2.81e-111
PCED1A	ENSG00000132635.16	33.975	89.659	-1.374	2e-96
CFLAR-AS1	ENSG00000226312.7	0.61	3.18	-1.376	8.08e-99
RRN3P3	ENSG00000257122.5	2.225	7.37	-1.376	4.28e-141
RP11-175K6.1	ENSG00000245812.2	1.06	4.35	-1.377	2.39e-96
FAHD2CP	ENSG00000231584.8	1.14	4.56	-1.378	2.41e-100
RPL36AP43	ENSG00000241362.2	0.37	2.56	-1.378	1.56e-98
GHRLOS	ENSG00000240288.7	0.3	2.38	-1.379	4.37e-147
CTD-2583A14.11	ENSG00000270804.1	2.995	9.4	-1.38	1.23e-103
PLGLB1	ENSG00000183281.14	1.705	6.04	-1.38	1.89e-83
RP11-440D17.4	ENSG00000273305.1	2.305	7.6	-1.38	2.85e-94
ZNRD1-AS1	ENSG00000204623.8	1.325	5.05	-1.38	7.12e-124
MIR22HG	ENSG00000186594.12	14.4	39.151	-1.382	2.24e-59
RP11-440L14.1	ENSG00000249592.5	3.505	10.74	-1.382	4.44e-92
MEDAG	ENSG00000102802.9	6.75	19.211	-1.383	1.05e-34
PVT1	ENSG00000249859.7	3.265	10.13	-1.384	3.79e-41
CTD-3092A11.1	ENSG00000215302.8	1.14	4.59	-1.385	8.72e-110
RP11-1024P17.1	ENSG00000261468.1	0.44	2.76	-1.385	1.06e-125
KMT2B	ENSG00000272333.5	14.38	39.199	-1.386	2.85e-111
AC078842.3	ENSG00000228031.2	0.04	1.72	-1.387	2.94e-124
SMG1P3	ENSG00000180747.15	3.025	9.53	-1.387	3.46e-104
RP11-261P9.4	ENSG00000254419.1	0.2	2.14	-1.388	2.27e-130
RP11-736N17.10	ENSG00000278071.1	0.07	1.8	-1.388	6.42e-116
AC098617.1	ENSG00000233766.7	0.68	3.4	-1.389	1.52e-92
OXCT2P1	ENSG00000237624.1	0.26	2.3	-1.389	1.56e-90
RP11-252A24.2	ENSG00000214331.8	2.42	7.96	-1.389	7.08e-110
RP11-651L5.3	ENSG00000277715.1	0.53	3.01	-1.39	3.78e-137
WHAMMP3	ENSG00000276141.4	1.285	4.99	-1.39	1.34e-143
ATAT1	ENSG00000137343.17	6.11	17.66	-1.392	4.99e-99
CTB-50L17.8	ENSG00000280239.1	0.635	3.29	-1.392	4.76e-119
PSMA3-AS1	ENSG00000257621.7	26.329	70.8	-1.394	2.61e-109
RP5-1068E13.7	ENSG00000273148.1	1.035	4.35	-1.394	6.08e-103
MAU2	ENSG00000129933.20	16.21	44.27	-1.395	2.25e-110
RP11-73M18.7	ENSG00000269940.1	2.62	8.52	-1.395	1.9e-92
RP11-762H8.2	ENSG00000259562.2	0.33	2.5	-1.396	3.67e-138
RP11-449P15.2	ENSG00000273151.1	0.69	3.45	-1.397	1.21e-98
RP11-158H5.2	ENSG00000279989.1	0.48	2.9	-1.398	3.12e-115
RP11-1275H24.2	ENSG00000272953.1	0.76	3.64	-1.399	4.2e-72
RP11-504P24.3	ENSG00000185495.10	3.27	10.28	-1.401	6.77e-119
CTC-479C5.10	ENSG00000263126.1	0.41	2.73	-1.403	2.65e-121
RP11-355O1.11	ENSG00000261094.2	2.34	7.83	-1.403	9.82e-122
RP11-1109F11.3	ENSG00000271327.1	0.95	4.16	-1.404	6.4e-86
RP11-418J17.1	ENSG00000231365.5	3.535	11	-1.404	1.01e-143
AC018462.3	ENSG00000242735.1	0.11	1.94	-1.405	5.7e-81
RP11-260M2.1	ENSG00000272807.1	1.08	4.51	-1.405	6.79e-98
RP11-373D23.2	ENSG00000270640.1	0.17	2.1	-1.406	2.4e-63
RP11-166O4.6	ENSG00000273448.1	0.505	2.99	-1.407	3.53e-126
RP11-23N2.4	ENSG00000260618.1	0.64	3.35	-1.407	9.09e-98
RP11-274B21.10	ENSG00000271553.1	0.44	2.82	-1.407	2.92e-104
AC074117.10	ENSG00000234072.1	2.25	7.63	-1.409	5.05e-114
RP11-333E1.2	ENSG00000263164.1	1.41	5.4	-1.409	7.54e-89
RP11-524F11.1	ENSG00000265511.1	0.57	3.17	-1.409	1.69e-96
ZSWIM8	ENSG00000214655.10	62.098	166.594	-1.409	2.74e-99
AC011290.5	ENSG00000236015.1	0.55	3.12	-1.41	3.2e-110
CTD-2007L18.5	ENSG00000260808.1	0.275	2.39	-1.411	2.46e-116
RP11-333E1.1	ENSG00000261879.5	1.535	5.74	-1.411	2.42e-122
CTC1	ENSG00000178971.13	13.36	37.219	-1.412	3.51e-103
LINC01126	ENSG00000279873.2	0.15	2.06	-1.412	9.46e-159
EVA1B	ENSG00000142694.6	17.155	47.422	-1.415	4.84e-42
HOXA-AS2	ENSG00000253552.7	0.635	3.36	-1.415	1.51e-92
RP11-206L10.1	ENSG00000224956.5	7.45	21.529	-1.415	1.39e-62
CTC-260E6.2	ENSG00000224864.4	0.635	3.37	-1.418	2.76e-45
LLNLF-176F2.1	ENSG00000282339.1	5.815	17.24	-1.42	3.23e-65
RP3-508I15.9	ENSG00000228274.3	1.43	5.5	-1.42	9.86e-124
RP11-1055B8.9	ENSG00000275966.1	0.295	2.47	-1.422	1.73e-62
RP11-242D8.1	ENSG00000267002.1	1.335	5.26	-1.423	5.84e-140
TMEM110-MUSTN1	ENSG00000248592.7	1.38	5.38	-1.423	7.84e-94
CCDC183	ENSG00000213213.13	1.735	6.34	-1.424	7.32e-93
MCM3AP-AS1	ENSG00000215424.9	1.28	5.12	-1.424	1.27e-145
MROH2A	ENSG00000185038.14	0.04	1.79	-1.424	6.48e-26
RP11-56G10.2	ENSG00000257386.1	0.17	2.14	-1.424	2.27e-09
AC008746.5	ENSG00000235681.1	0.665	3.47	-1.425	4.03e-51
CTD-2013N24.2	ENSG00000244513.6	1.145	4.76	-1.425	3.02e-117
LINC00482	ENSG00000185168.5	0.47	2.95	-1.426	3.51e-108
GOLGA2P10	ENSG00000255769.7	3.28	10.51	-1.427	9.61e-74
PHC1P1	ENSG00000179899.8	1.25	5.05	-1.427	8.31e-116
RP11-358L22.3	ENSG00000276007.1	1.385	5.42	-1.429	1.04e-117
CTD-2527I21.14	ENSG00000271032.1	0.31	2.53	-1.43	1.41e-98
SOX9-AS1	ENSG00000234899.9	0.945	4.24	-1.43	8.98e-62
CTC-435M10.12	ENSG00000277744.1	1.095	4.65	-1.431	4.88e-87
CTD-2595P9.4	ENSG00000275155.1	0.22	2.29	-1.431	3.21e-124
AC004623.3	ENSG00000279488.1	0.19	2.21	-1.432	5.96e-136
RP11-274B21.12	ENSG00000229413.2	7.12	20.93	-1.433	1.42e-75
RP11-73M18.10	ENSG00000269910.1	2.04	7.21	-1.433	6.74e-94
AC002398.12	ENSG00000267328.1	0.325	2.58	-1.434	1.4e-67
KB-431C1.5	ENSG00000272037.1	0.29	2.49	-1.436	4.28e-140
RP11-690I21.1	ENSG00000237641.1	0.445	2.91	-1.436	2.49e-93
C1RL-AS1	ENSG00000205885.7	1.16	4.85	-1.437	6.56e-97
EFCC1	ENSG00000114654.7	1.37	5.42	-1.438	6.17e-71
LINC-PINT	ENSG00000231721.6	12.775	36.329	-1.438	1.45e-113
SREK1	ENSG00000153914.15	24.195	67.241	-1.438	5.78e-106
RPS2P7	ENSG00000235508.3	0.39	2.77	-1.439	4.19e-93
RP11-273B20.1	ENSG00000256967.1	0.83	3.98	-1.444	2.59e-108
TMEM246	ENSG00000165152.8	1.04	4.55	-1.444	1.31e-36
GSAP	ENSG00000186088.15	10.23	29.57	-1.445	1.59e-129
PGM5-AS1	ENSG00000224958.5	0.12	2.05	-1.445	2.3e-123
SNORD3A	ENSG00000263934.4	63.399	174.501	-1.446	4.8e-11
ARMC12	ENSG00000157343.8	0.18	2.22	-1.448	1.69e-133
AC073130.3	ENSG00000243243.5	0.215	2.32	-1.45	5.32e-124
AC093642.1	ENSG00000280119.1	0.065	1.91	-1.45	3.68e-119
FAM110D	ENSG00000197245.4	1.965	7.1	-1.45	1.55e-72
PSMD5-AS1	ENSG00000226752.7	9.805	28.531	-1.45	6.51e-60
RP11-1228E12.1	ENSG00000280279.1	1.885	6.88	-1.45	1.03e-86
RP1-159A19.3	ENSG00000235912.1	0.96	4.36	-1.451	2.05e-43
CTD-2574D22.4	ENSG00000260114.2	1.01	4.5	-1.452	3.66e-167
RP5-902P8.10	ENSG00000230415.1	1.05	4.61	-1.452	2e-72
CTA-223H9.9	ENSG00000273424.1	0.37	2.75	-1.453	1.15e-102
DUSP8P5	ENSG00000235316.1	0.57	3.3	-1.454	1.8e-139
RP11-216L13.19	ENSG00000273066.5	0.38	2.78	-1.454	1.21e-130
RP11-32B5.1	ENSG00000237161.4	0.15	2.15	-1.454	1.96e-145
C4A-AS1	ENSG00000233627.2	0.55	3.25	-1.455	1.31e-75
C4B-AS1	ENSG00000229776.1	0.55	3.25	-1.455	1.31e-75
RP11-147L13.13	ENSG00000277476.1	2.55	8.73	-1.455	2.99e-100
RP11-395I6.3	ENSG00000260296.1	2.02	7.28	-1.455	2.53e-102
RP4-583P15.10	ENSG00000229299.2	1.19	5.01	-1.456	5.91e-62
RP11-11N7.5	ENSG00000277877.4	0.85	4.08	-1.457	1.1e-77
PCAT14	ENSG00000280623.1	0.03	1.83	-1.458	1.77e-131
STARD9	ENSG00000159433.11	0.98	4.44	-1.458	1.51e-102
RP11-12A20.4	ENSG00000278134.1	0.24	2.41	-1.459	1.29e-103
RP11-728F11.4	ENSG00000254528.7	0.255	2.45	-1.459	1.47e-91
RP1-172N19.5	ENSG00000269911.1	1.375	5.54	-1.461	9.88e-146
LRRC75B	ENSG00000178026.12	20.225	57.472	-1.462	9.99e-76
RP11-33B1.1	ENSG00000245958.6	7.94	23.63	-1.462	1.51e-114
RP3-402G11.25	ENSG00000273188.1	0.59	3.38	-1.462	2.97e-135
AP001062.8	ENSG00000241728.5	0.57	3.33	-1.464	1.4e-93
H1FX-AS1	ENSG00000206417.8	3.27	10.79	-1.465	6.98e-58
RN7SKP16	ENSG00000222112.1	0.22	2.37	-1.466	2.52e-92
AP001189.4	ENSG00000236304.1	0.1	2.04	-1.467	9.17e-128
RP11-526I2.5	ENSG00000270127.2	0.92	4.31	-1.468	1.97e-83
CTD-2647L4.4	ENSG00000259366.1	1.13	4.9	-1.47	2.59e-130
SNORA59A	ENSG00000239149.1	0	1.77	-1.47	2.94e-14
RP1-283E3.4	ENSG00000227775.3	2.475	8.64	-1.472	4.5e-89
RRP7BP	ENSG00000182841.12	7.23	21.83	-1.472	9.99e-82
RP11-23J9.5	ENSG00000254876.5	0.61	3.47	-1.473	5.61e-161
SNORA59B	ENSG00000266079.4	0.47	3.08	-1.473	5.66e-31
RP3-329A5.8	ENSG00000272374.1	0.4	2.89	-1.474	5.87e-156
LSMEM1	ENSG00000181016.9	0.63	3.53	-1.475	1.09e-106
RPL23P2	ENSG00000176054.6	0.745	3.85	-1.475	1.04e-127
RP11-285J16.1	ENSG00000271993.1	0.51	3.2	-1.476	2.62e-116
RP11-34P13.13	ENSG00000241860.6	1.83	6.87	-1.476	2.79e-67
AC116366.6	ENSG00000234290.2	0.53	3.26	-1.477	6.82e-148
GOLGA8K	ENSG00000249931.4	0.39	2.87	-1.477	2.52e-138
FABP5P7	ENSG00000234964.4	11.125	32.789	-1.479	7.64e-57
RP11-490B18.6	ENSG00000276523.1	0.46	3.07	-1.479	7.21e-114
SRSF5	ENSG00000100650.15	217.3	607.608	-1.479	9.56e-112
CH17-258A22.4	ENSG00000274615.1	2.94	9.99	-1.48	9.31e-45
PLEKHD1	ENSG00000175985.9	0.14	2.18	-1.48	5.46e-79
RP11-250B2.3	ENSG00000233967.6	0.68	3.69	-1.481	2.51e-120
ACKR2	ENSG00000144648.14	0.31	2.66	-1.482	3.3e-167
PFN1P2	ENSG00000270392.2	1.09	4.84	-1.482	2.05e-93
AC137934.1	ENSG00000260923.5	2.165	7.85	-1.483	4.18e-45
CTC-550B14.7	ENSG00000267265.5	1.105	4.89	-1.484	6.8e-131
RP5-1057I20.5	ENSG00000276691.1	0.28	2.58	-1.484	6.25e-91
AC108488.4	ENSG00000242282.6	2.19	7.93	-1.485	1.81e-132
ARMCX4	ENSG00000196440.11	8.17	24.68	-1.486	1.78e-118
RP5-1057I20.4	ENSG00000268069.2	3.83	12.53	-1.486	1.03e-83
CTC-260E6.6	ENSG00000267383.6	1.03	4.69	-1.487	3.64e-110
AP001062.7	ENSG00000184441.4	1.46	5.9	-1.488	1.41e-145
RP11-278C7.1	ENSG00000257511.1	0.75	3.91	-1.488	1.95e-144
RP11-441O15.3	ENSG00000224934.2	0.33	2.73	-1.488	4.12e-132
RP11-332H14.2	ENSG00000272994.1	0.57	3.41	-1.49	8.39e-171
AC093609.1	ENSG00000230587.1	0.06	1.98	-1.491	1.74e-174
HID1	ENSG00000167861.15	9.88	29.611	-1.492	2.24e-102
AC074212.6	ENSG00000267395.5	2.21	8.04	-1.494	3.12e-102
RP5-882C2.2	ENSG00000260793.2	1.325	5.55	-1.494	1.57e-114
CTD-2196E14.6	ENSG00000260751.2	0.71	3.83	-1.498	3.4e-98
RP3-406P24.5	ENSG00000279926.1	0.65	3.66	-1.498	1.13e-97
N4BP2L2-IT2	ENSG00000281026.1	0.33	2.76	-1.499	1.27e-137
NPIPA2	ENSG00000254852.8	0.1	2.11	-1.499	1.12e-98
RP11-167N5.5	ENSG00000267834.1	0.21	2.42	-1.499	1.97e-123
RP11-361L15.5	ENSG00000280334.1	0.27	2.59	-1.499	8.59e-122
DEFA1	ENSG00000206047.2	0	1.83	-1.501	2.95e-63
FRMPD3	ENSG00000147234.10	1.215	5.27	-1.501	8.42e-91
FAM27B	ENSG00000278763.1	0.13	2.2	-1.502	8.55e-25
RP1-167F1.2	ENSG00000226786.2	0.68	3.76	-1.502	2.03e-120
RP11-206L10.9	ENSG00000237491.8	1.375	5.73	-1.503	4.97e-113
RP11-497H16.5	ENSG00000196302.5	1.77	6.85	-1.503	8.12e-43
AC009237.17	ENSG00000235959.1	1.535	6.19	-1.504	2.7e-50
ENPP7P11	ENSG00000250942.1	0.85	4.25	-1.505	3.52e-67
RP11-295P9.12	ENSG00000273474.1	0.455	3.13	-1.505	1.23e-96
RP11-439C15.4	ENSG00000253764.1	0.11	2.15	-1.505	2.19e-105
RP11-481J2.4	ENSG00000276259.1	1.85	7.09	-1.505	2.41e-123
AC009238.7	ENSG00000227120.1	1.535	6.2	-1.506	5.4e-52
DPH7	ENSG00000148399.11	18.43	54.179	-1.506	4.99e-104
RN7SL145P	ENSG00000244357.3	0.285	2.66	-1.51	8.39e-106
RP11-801F7.1	ENSG00000272851.1	0	1.85	-1.511	2.41e-38
ANKRD18A	ENSG00000180071.18	0.935	4.52	-1.512	3.21e-100
AC099668.5	ENSG00000259970.1	0.635	3.67	-1.514	9.75e-58
AC034220.3	ENSG00000233006.6	3.93	13.09	-1.515	9.02e-104
ZNF213-AS1	ENSG00000263072.5	9.875	30.08	-1.515	1.7e-117
RP13-516M14.8	ENSG00000280407.2	0.21	2.46	-1.516	4.74e-147
C9orf173-AS1	ENSG00000275549.1	0.44	3.12	-1.517	2.03e-83
RP11-304L19.11	ENSG00000261663.1	0.725	3.94	-1.518	9.89e-106
AC009237.11	ENSG00000236431.1	1.285	5.55	-1.519	2.31e-90
OR2A20P	ENSG00000170356.8	7.18	22.441	-1.519	1.12e-51
RP13-516M14.1	ENSG00000260563.3	3.68	12.41	-1.519	2.88e-105
NFYC-AS1	ENSG00000272145.1	0.775	4.09	-1.52	1.89e-136
RP11-486G15.2	ENSG00000271576.1	0.43	3.1	-1.52	1.11e-129
RP11-424G14.1	ENSG00000260197.1	0	1.87	-1.521	6.11e-44
MIR143HG	ENSG00000249669.7	0.41	3.05	-1.522	9.11e-92
RAMP2-AS1	ENSG00000197291.8	0.37	2.94	-1.524	5.96e-129
CTSLP2	ENSG00000266217.2	0.34	2.86	-1.526	2.5e-126
TTTY15	ENSG00000233864.7	0	1.88	-1.526	6.53e-18
HNRNPA1P7	ENSG00000215492.6	0.41	3.07	-1.529	3.69e-93
TCEB1P19	ENSG00000241975.1	1.415	5.97	-1.529	5.85e-86
AC007292.6	ENSG00000267980.1	0.895	4.48	-1.532	1.5e-106
FAM156B	ENSG00000179304.16	9.655	29.821	-1.532	1.82e-68
RP11-411B6.6	ENSG00000255339.6	0.885	4.45	-1.532	5.78e-92
RP11-33B1.4	ENSG00000260091.1	1.015	4.83	-1.533	6.16e-114
CLUH	ENSG00000132361.16	12.965	39.439	-1.534	2.76e-146
RP1-102E24.8	ENSG00000256433.2	0.43	3.14	-1.534	1.42e-146
SNHG3	ENSG00000242125.3	11.945	36.511	-1.535	1.02e-94
RP11-378A13.2	ENSG00000273361.1	0.975	4.74	-1.539	1.96e-104
RP4-583P15.15	ENSG00000273154.3	1.88	7.37	-1.539	4.99e-109
RP3-508I15.20	ENSG00000273096.1	0	1.91	-1.541	1.31e-38
SBSPON	ENSG00000164764.10	0.35	2.93	-1.542	8.53e-155
TTC34	ENSG00000215912.10	0.335	2.89	-1.543	1.46e-148
RP11-384K6.6	ENSG00000260404.2	1.99	7.72	-1.544	2.98e-115
RP11-574K11.32	ENSG00000279689.1	1.11	5.16	-1.546	2.48e-61
SEMA3F-AS1	ENSG00000235016.1	0.73	4.05	-1.546	7.41e-125
PAXBP1	ENSG00000159086.14	9.755	30.439	-1.548	8.21e-104
RP11-89K11.1	ENSG00000259658.3	2.855	10.27	-1.548	6.43e-118
GS1-124K5.11	ENSG00000229180.5	1.74	7.04	-1.553	5.65e-154
OR2A9P	ENSG00000228960.5	9.715	30.431	-1.553	1.17e-87
CTD-2227E11.1	ENSG00000270933.1	0.8	4.29	-1.555	5.52e-73
RP11-106M3.3	ENSG00000261460.1	0.48	3.35	-1.555	1.52e-136
CTC-510F12.2	ENSG00000267082.1	0.37	3.03	-1.557	1.13e-111
RP11-774O3.3	ENSG00000251615.3	2.78	10.12	-1.557	1.89e-110
NR2F2-AS1	ENSG00000247809.7	0.65	3.87	-1.561	1.41e-126
STAG3L1	ENSG00000205583.13	3.185	11.36	-1.562	7.23e-88
BNIP3P17	ENSG00000271524.1	0.57	3.64	-1.563	1.24e-35
RP11-457M11.5	ENSG00000261584.1	0.73	4.12	-1.565	2.41e-104
KB-1208A12.3	ENSG00000245970.2	1.22	5.58	-1.567	3.91e-116
TMEM259	ENSG00000182087.12	79.881	238.657	-1.567	1.27e-120
SCART1	ENSG00000214279.12	0.535	3.55	-1.568	7.92e-105
RP11-572O17.1	ENSG00000270195.1	0.79	4.31	-1.569	7.97e-78
FAM157C	ENSG00000260528.3	1.01	4.97	-1.57	1.96e-82
AC005154.7	ENSG00000244480.1	0.88	4.6	-1.575	2.9e-110
DTX2P1-UPK3BP1-PMS2P11	ENSG00000265479.5	1.785	7.3	-1.575	1.5e-131
AP000866.1	ENSG00000279342.1	0.64	3.89	-1.576	4.26e-114
RHOXF1-AS1	ENSG00000258545.5	1.25	5.71	-1.576	4.47e-32
RP11-12J10.4	ENSG00000278831.1	0.63	3.86	-1.576	3.01e-148
RN7SL381P	ENSG00000263968.2	0.26	2.76	-1.577	5.02e-93
MROH1	ENSG00000179832.17	30.29	92.481	-1.579	7.09e-119
OR2A1-AS1	ENSG00000244479.6	14.195	44.43	-1.58	3.39e-96
AC005517.3	ENSG00000223878.1	0.91	4.72	-1.582	3.61e-98
CTB-50L17.9	ENSG00000267769.1	0.55	3.64	-1.582	1.46e-89
RP11-480A16.1	ENSG00000260261.1	0.72	4.15	-1.582	6.12e-114
RP11-79D8.2	ENSG00000240979.1	2.9	10.69	-1.584	1.19e-74
AC009120.3	ENSG00000239763.2	0.61	3.83	-1.585	1.28e-125
CTD-2017F17.2	ENSG00000274383.1	3	11.02	-1.587	4.28e-77
NPIPA7	ENSG00000214967.5	5.93	19.821	-1.587	8.11e-78
RP11-465B22.8	ENSG00000272141.1	2.035	8.12	-1.587	7.91e-44
RP11-582J16.5	ENSG00000253200.1	1.11	5.34	-1.587	2.16e-156
CTC-301O7.4	ENSG00000197813.5	0.24	2.73	-1.589	1.22e-162
U73166.2	ENSG00000230454.1	0.33	3	-1.589	2.68e-147
RP11-206L10.3	ENSG00000235373.1	0.3	2.92	-1.592	2.01e-123
RP11-98J23.2	ENSG00000198237.8	1.485	6.49	-1.592	6.35e-103
ITPR1-AS1	ENSG00000231249.1	0.21	2.65	-1.593	7.86e-143
RP11-645C24.5	ENSG00000260306.1	0.835	4.55	-1.597	7.97e-103
CTD-2626G11.2	ENSG00000268416.1	2.355	9.16	-1.599	8.99e-86
MST1L	ENSG00000186715.10	2.41	9.33	-1.599	1.79e-49
RP11-23P13.6	ENSG00000174171.5	2.925	10.89	-1.599	1.06e-33
RP11-384K6.2	ENSG00000225892.3	3.16	11.6	-1.599	2.44e-111
TRIM73	ENSG00000178809.11	1.47	6.48	-1.599	2.5e-80
CICP14	ENSG00000281490.1	3.15	11.58	-1.6	5.61e-96
ADGRA3	ENSG00000152990.13	8.65	28.281	-1.601	3.06e-99
CTD-2368P22.1	ENSG00000176593.7	3.34	12.17	-1.601	3.64e-121
BNIP3P18	ENSG00000269055.1	0.13	2.43	-1.602	2.56e-126
AC073850.6	ENSG00000229436.1	0	2.04	-1.604	5.47e-95
RP11-379B18.5	ENSG00000241288.7	1.3	5.99	-1.604	4.96e-116
AC009133.21	ENSG00000275857.1	1.025	5.16	-1.605	1.76e-42
CSPG4P10	ENSG00000276710.4	0.35	3.11	-1.606	3.18e-137
CTD-2516F10.2	ENSG00000251364.6	1.875	7.75	-1.606	4.26e-121
GOLGA6L4	ENSG00000184206.11	1.63	7.03	-1.61	4.83e-101
TSSC2	ENSG00000223756.6	0.35	3.12	-1.61	2.43e-131
CFAP43	ENSG00000197748.12	1.125	5.49	-1.611	1.06e-117
RP11-97C16.1	ENSG00000271870.1	4.395	15.48	-1.611	2.7e-95
LINC00115	ENSG00000225880.5	1.015	5.16	-1.612	6.46e-103
PCBP1-AS1	ENSG00000179818.13	9.595	31.38	-1.612	2.38e-94
CTC-260E6.4	ENSG00000280079.1	1.16	5.61	-1.614	6.67e-50
RP11-45M22.2	ENSG00000278864.1	1.215	5.78	-1.614	8.56e-102
CTC-338M12.4	ENSG00000233937.6	5.085	17.68	-1.618	2.56e-107
HAND2-AS1	ENSG00000237125.8	0.13	2.47	-1.619	8.38e-149
RP11-465N4.5	ENSG00000273478.1	1.67	7.22	-1.622	8.19e-106
RSRP1	ENSG00000117616.17	54.604	170.437	-1.624	1.93e-61
RP11-235E17.6	ENSG00000262903.1	0.78	4.49	-1.625	2.56e-81
CTC-529I10.1	ENSG00000275413.1	0.84	4.68	-1.626	2.17e-100
MIR210HG	ENSG00000247095.2	0.92	4.93	-1.627	5.89e-108
AC017116.11	ENSG00000239775.1	0.85	4.72	-1.629	4.22e-94
AC005786.7	ENSG00000267436.1	2.545	9.98	-1.631	8.41e-30
RP11-325K4.2	ENSG00000261114.1	0.85	4.73	-1.631	1.09e-126
FAXDC2	ENSG00000170271.10	12.085	39.601	-1.634	2.45e-78
STAG3L3	ENSG00000174353.17	9.44	31.48	-1.637	3.05e-117
LINC00472	ENSG00000233237.6	1.125	5.62	-1.639	3.94e-137
AC068134.10	ENSG00000251485.1	0.6	3.99	-1.641	9.12e-148
RP11-933H2.4	ENSG00000250608.1	0.44	3.49	-1.641	1.44e-124
AP002518.1	ENSG00000280653.1	2.89	11.18	-1.647	6.06e-08
AD000684.2	ENSG00000268947.1	0.42	3.45	-1.648	3.09e-152
DOC2GP	ENSG00000231793.4	0.42	3.45	-1.648	3.75e-125
AC010976.2	ENSG00000231731.7	0.43	3.49	-1.651	7.41e-137
RP11-264B17.3	ENSG00000261067.6	0.33	3.18	-1.652	1.04e-144
RP11-1415C14.4	ENSG00000254701.3	0.93	5.07	-1.653	2.35e-90
RP3-449O17.1	ENSG00000244627.5	4.03	14.83	-1.654	1.95e-103
RPL32P3	ENSG00000251474.6	4.55	16.48	-1.655	2.16e-131
GOLGA8O	ENSG00000206127.10	0.24	2.91	-1.657	4.4e-81
FZD10-AS1	ENSG00000250208.6	0.66	4.24	-1.658	1.79e-127
RP11-666A8.8	ENSG00000267546.2	0.69	4.34	-1.66	3.01e-117
RP3-368A4.5	ENSG00000271430.1	2.26	9.3	-1.66	2.29e-124
NPIPA3	ENSG00000224712.10	2.46	9.94	-1.661	6.36e-82
RP11-972P1.11	ENSG00000278112.1	0.29	3.08	-1.661	8.01e-158
PMS2P3	ENSG00000127957.16	3.715	13.92	-1.662	1.29e-125
TTN-AS1	ENSG00000237298.8	7.01	24.35	-1.662	1.53e-78
LENG8-AS1	ENSG00000226696.5	3.125	12.06	-1.663	8.26e-104
RP11-304L19.12	ENSG00000259780.3	0.77	4.61	-1.664	1.23e-68
TMEM253	ENSG00000232070.8	1.255	6.16	-1.667	9.85e-85
ZNF783	ENSG00000204946.9	4.275	15.77	-1.669	1.18e-141
RP11-274B21.14	ENSG00000242588.5	2.275	9.42	-1.67	1.25e-101
RMST_6	ENSG00000275971.1	1.265	6.22	-1.672	9.32e-23
RP4-548D19.3	ENSG00000272661.1	0.56	3.97	-1.672	5.14e-52
RP11-157P1.4	ENSG00000226332.2	2.195	9.19	-1.673	3.58e-72
VDAC1P8	ENSG00000229036.7	1.24	6.15	-1.674	5.04e-121
MTMR9LP	ENSG00000220785.7	6.42	22.689	-1.675	8.36e-73
XXbac-B461K10.4	ENSG00000093100.13	3.825	14.44	-1.678	1.03e-117
RP11-258C19.7	ENSG00000270189.1	3.08	12.06	-1.679	1.15e-109
TDH	ENSG00000154316.14	0.17	2.76	-1.684	2.72e-113
LINC00896	ENSG00000236499.2	0.48	3.76	-1.685	1.91e-94
YEATS2-AS1	ENSG00000233885.7	0.33	3.28	-1.686	3.9e-154
CROCCP3	ENSG00000080947.14	1.855	8.19	-1.687	1.73e-103
MT1XP1	ENSG00000233929.1	0	2.22	-1.687	3.25e-41
CFAP69	ENSG00000105792.19	2.935	11.7	-1.69	1.22e-135
CDH12P2	ENSG00000249230.1	0	2.23	-1.692	4.28e-15
RP6-24A23.3	ENSG00000237863.2	0.37	3.43	-1.693	4.47e-107
RP11-148K1.12	ENSG00000244151.1	0.6	4.18	-1.695	1.12e-125
NPIPB11	ENSG00000254206.5	0.48	3.8	-1.697	1.41e-116
CTD-2303H24.2	ENSG00000273018.5	0.68	4.45	-1.698	1.26e-65
AC005154.6	ENSG00000196295.11	20.865	70.082	-1.701	5.16e-81
CYP4F32P	ENSG00000223564.1	0.07	2.48	-1.701	2.28e-108
RP11-498C9.4	ENSG00000278876.1	0.8	4.86	-1.703	7.35e-76
RP13-514E23.2	ENSG00000273389.1	0.21	2.94	-1.703	1.64e-76
PCAT19	ENSG00000267107.6	1.71	7.83	-1.704	6.08e-124
CTD-2649C14.2	ENSG00000274460.1	0.64	4.36	-1.709	5.25e-92
KIAA1875	ENSG00000179698.13	0.48	3.84	-1.709	1.14e-118
ACKR3	ENSG00000144476.5	15.51	53.09	-1.712	1.18e-77
SMG1P1	ENSG00000237296.9	3.05	12.27	-1.712	5.38e-115
RP11-171I2.4	ENSG00000271141.1	0.755	4.77	-1.717	2.81e-112
RP11-7F17.8	ENSG00000273729.1	0.49	3.9	-1.717	1.69e-159
RP11-59C5.3	ENSG00000273599.1	0.37	3.51	-1.719	6.36e-132
CTC-529I10.2	ENSG00000227782.2	1.055	5.77	-1.72	1.35e-119
RP11-192H23.8	ENSG00000264608.1	1.675	7.81	-1.72	2.36e-108
RP1-261G23.7	ENSG00000272114.1	85.623	284.325	-1.72	4.72e-48
PRPS1P2	ENSG00000232630.1	0.45	3.78	-1.721	8.18e-161
SYNDIG1	ENSG00000101463.5	1.045	5.74	-1.721	1.72e-73
AC079781.7	ENSG00000232032.1	0	2.3	-1.722	4.46e-17
RP11-972P1.10	ENSG00000274427.1	0.54	4.08	-1.722	5.97e-94
CTD-2547G23.4	ENSG00000274925.1	0.86	5.14	-1.723	3.09e-110
RP11-1280N14.3	ENSG00000251634.2	0.465	3.85	-1.727	1.9e-105
THUMPD3-AS1	ENSG00000206573.8	19.35	66.421	-1.728	3.95e-117
CFAP70	ENSG00000156042.17	4.46	17.111	-1.73	1.56e-69
RP5-890O3.9	ENSG00000240731.1	3.645	14.43	-1.732	1.57e-120
LINC00092	ENSG00000225194.2	1.05	5.82	-1.734	7.06e-97
MOK	ENSG00000080823.21	9.71	34.659	-1.735	5.14e-149
SCARNA12	ENSG00000238795.1	0.33	3.43	-1.736	7.89e-86
RP11-350N15.4	ENSG00000255201.1	0.18	2.94	-1.739	3.49e-107
PVRIG2P	ENSG00000235333.3	0	2.34	-1.74	2e-49
RP11-395N3.2	ENSG00000272622.1	0.56	4.21	-1.74	2e-134
AC083843.1	ENSG00000259820.1	0.72	4.78	-1.749	3.65e-130
AC006126.4	ENSG00000267045.1	3.435	13.95	-1.753	3.73e-46
RP11-166B2.1	ENSG00000234719.8	3.945	15.68	-1.754	5.72e-75
RP5-1074L1.4	ENSG00000273373.1	1.84	8.58	-1.754	1.53e-82
RP11-378J18.9	ENSG00000276997.4	2.62	11.22	-1.755	6.31e-112
RP11-448G15.3	ENSG00000261490.1	0.51	4.1	-1.756	8.34e-139
AC007566.10	ENSG00000244055.1	1.115	6.15	-1.757	2.03e-118
PFN1P6	ENSG00000227212.3	0.65	4.58	-1.758	8.09e-100
SMG1P7	ENSG00000261556.8	1.23	6.55	-1.759	9.5e-94
RP11-72I8.1	ENSG00000260735.1	0.47	3.98	-1.76	9.31e-144
PIDD1	ENSG00000177595.17	7.7	28.541	-1.764	2.04e-91
SRSF11	ENSG00000116754.13	67.829	232.808	-1.764	5.24e-110
CTD-2012K14.6	ENSG00000261386.2	0.165	2.96	-1.765	4.97e-129
TBX2-AS1	ENSG00000267280.5	1.265	6.7	-1.765	6.56e-32
TEN1-CDK3	ENSG00000261408.5	0.86	5.33	-1.767	1.23e-100
METTL17	ENSG00000165792.17	27.575	96.388	-1.769	1.14e-136
EP400NL	ENSG00000185684.12	4.1	16.42	-1.772	3.25e-131
RP11-496H1.1	ENSG00000249626.1	1.285	6.81	-1.773	1.69e-100
KRT18P13	ENSG00000214417.4	0.43	3.89	-1.774	1.53e-114
RP11-1022B3.1	ENSG00000258117.2	0	2.42	-1.774	1.33e-64
RP13-895J2.4	ENSG00000278872.1	0.16	2.97	-1.775	9.29e-129
NBPF26	ENSG00000273136.5	3.005	12.72	-1.776	1.98e-94
PLEKHM1P	ENSG00000214176.9	5.645	21.78	-1.777	1.79e-103
LINC01001	ENSG00000230724.9	7.815	29.29	-1.781	1.03e-100
RBM5-AS1	ENSG00000281691.1	0.48	4.09	-1.782	6.16e-131
RP11-34P13.15	ENSG00000268903.1	7.06	26.711	-1.782	1.77e-57
NPIPA5	ENSG00000183793.13	8.315	31.139	-1.787	4.15e-49
RP11-600F24.7	ENSG00000260285.1	1.03	6.01	-1.788	1.12e-136
DICER1-AS1	ENSG00000235706.7	3.705	15.26	-1.789	3.56e-108
NSUN5P2	ENSG00000106133.17	12.96	47.251	-1.789	1.64e-75
AC010761.9	ENSG00000265474.1	0.56	4.4	-1.791	3.31e-99
HMGN2P15	ENSG00000214578.5	0.81	5.27	-1.792	1.79e-101
LINC00926	ENSG00000247982.6	0.4	3.85	-1.793	8.88e-93
HECTD4	ENSG00000173064.10	11.17	41.2	-1.794	4.31e-141
AC010883.5	ENSG00000234936.1	0.82	5.32	-1.796	3.24e-135
ARHGEF28	ENSG00000214944.9	4.365	17.66	-1.798	9.52e-102
KB-1572G7.2	ENSG00000273000.5	2.35	10.69	-1.803	2.69e-81
RP11-757F18.5	ENSG00000261488.1	1.325	7.13	-1.806	5.42e-108
RP11-256I23.2	ENSG00000269068.1	0.47	4.15	-1.809	3.13e-121
AC005253.2	ENSG00000268030.1	0.74	5.1	-1.81	2.01e-136
RP11-701H24.4	ENSG00000261069.3	1.31	7.1	-1.81	3.1e-104
RP11-1000B6.3	ENSG00000261064.1	1.565	8	-1.811	1.01e-97
RAB11FIP1P1	ENSG00000228492.2	1.065	6.25	-1.812	3.8e-120
AP000347.2	ENSG00000272578.5	1.3	7.08	-1.813	1.7e-102
RP11-274B21.4	ENSG00000230715.3	7.49	28.879	-1.815	9.82e-106
MST1P2	ENSG00000186301.8	1.485	7.75	-1.816	1.08e-75
RP11-181G12.2	ENSG00000182873.5	1.715	8.56	-1.816	2.71e-101
RP5-855D21.1	ENSG00000272240.1	1.55	8	-1.819	6.64e-97
SNORD10	ENSG00000238917.1	0	2.53	-1.82	7.97e-06
CTD-2600O9.2	ENSG00000276166.1	0.52	4.37	-1.821	1.05e-121
RP11-1212A22.4	ENSG00000233024.7	54.915	196.61	-1.821	1.86e-110
C6orf49	ENSG00000278224.4	0.98	6	-1.822	9e-120
RP11-186B7.4	ENSG00000264772.5	0.88	5.65	-1.823	6.17e-150
SLC25A25-AS1	ENSG00000234771.3	1.04	6.22	-1.823	5.05e-136
NPPA-AS1	ENSG00000242349.5	0.68	4.95	-1.824	1.64e-120
CEP95	ENSG00000258890.6	18.355	67.611	-1.826	7.71e-137
RNF139-AS1	ENSG00000245149.3	1.32	7.23	-1.827	6.28e-114
LINC01539	ENSG00000267712.5	0.11	2.94	-1.828	2.36e-158
MT1JP	ENSG00000255986.6	0.09	2.87	-1.828	2.19e-80
UBAP1L	ENSG00000246922.8	1.135	6.58	-1.828	1.38e-143
SPAG5-AS1	ENSG00000227543.4	0.56	4.56	-1.834	1.8e-189
SEPT7P2	ENSG00000214765.8	4.78	19.62	-1.835	5.05e-159
LINC01237	ENSG00000233806.7	0.44	4.14	-1.836	3.58e-131
RP11-228M15.1	ENSG00000274471.1	1.12	6.58	-1.838	1.32e-96
CFAP44	ENSG00000206530.8	2.37	11.06	-1.839	2.09e-99
RP11-499P20.2	ENSG00000240291.1	0.81	5.48	-1.84	4.04e-144
FTLP3	ENSG00000226608.3	1.875	9.31	-1.842	9.72e-95
RP5-894A10.2	ENSG00000244701.1	2.365	11.06	-1.842	9.44e-122
RP5-1056L3.3	ENSG00000226396.1	0.62	4.81	-1.843	7.18e-111
RP3-426I6.5	ENSG00000269971.1	0	2.59	-1.844	7.34e-42
AC002116.8	ENSG00000248101.2	0.3	3.67	-1.845	5.95e-83
RP11-473M20.9	ENSG00000262370.5	0.75	5.29	-1.846	2.56e-116
RP11-793H13.8	ENSG00000257379.1	1.29	7.23	-1.846	5.31e-122
INE1	ENSG00000224975.1	0.945	6.01	-1.85	4.27e-123
RP11-274B21.2	ENSG00000243302.3	6.435	25.801	-1.85	1.83e-100
CTB-89H12.4	ENSG00000230551.4	3.38	14.83	-1.854	1.89e-115
RP6-24A23.7	ENSG00000261409.1	0.12	3.06	-1.858	5.76e-121
LINC01004	ENSG00000228393.3	2.26	10.83	-1.859	1.39e-90
RP11-392E22.9	ENSG00000273170.5	0.13	3.1	-1.859	4.14e-149
RP11-19P22.8	ENSG00000266872.1	4.105	17.57	-1.863	7.15e-81
HMCN2	ENSG00000148357.16	0.45	4.3	-1.87	1.41e-107
AC159540.1	ENSG00000230606.10	7.98	31.86	-1.872	4.29e-69
RP11-399E6.4	ENSG00000229901.1	0.33	3.87	-1.872	1.54e-128
CNTNAP3B	ENSG00000154529.14	0.36	3.98	-1.873	1.48e-132
LA16c-358B7.3	ENSG00000261505.1	1.065	6.58	-1.876	6.18e-114
RP5-1159O4.1	ENSG00000272894.5	1.735	9.07	-1.88	2.36e-88
AKAP17A	ENSG00000197976.10	18.88	72.208	-1.881	1.49e-138
RP11-347I19.7	ENSG00000274292.1	0.75	5.45	-1.882	6.19e-132
RP11-203M5.7	ENSG00000258515.1	0.81	5.68	-1.884	9.35e-111
SUGP2	ENSG00000064607.16	29.965	113.393	-1.885	3.38e-154
CTB-31O20.4	ENSG00000267244.5	0.37	4.07	-1.888	3.72e-146
AC078899.3	ENSG00000269274.1	0.08	3	-1.889	9.87e-134
RP11-197N18.2	ENSG00000256028.2	0.45	4.39	-1.894	5.52e-141
RP4-669L17.8	ENSG00000250575.1	2.21	10.93	-1.894	6.61e-95
LL0XNC01-7P3.1	ENSG00000270012.1	0.945	6.24	-1.896	2.41e-125
RP11-87H9.4	ENSG00000280077.1	3.07	14.15	-1.896	7.84e-106
LINC01355	ENSG00000261326.2	1.72	9.13	-1.897	2.23e-99
RP11-540B6.6	ENSG00000270015.1	2.255	11.14	-1.899	1.14e-153
CTB-13F3.1	ENSG00000273055.1	0.74	5.5	-1.901	1.07e-118
RP11-122K13.12	ENSG00000235245.1	0.65	5.16	-1.901	6.18e-135
SEMA6A-AS1	ENSG00000248445.5	1.095	6.83	-1.902	7.61e-145
RP11-334C17.5	ENSG00000262580.5	3.865	17.19	-1.903	7.82e-68
RP4-717I23.3	ENSG00000223745.7	15.205	59.61	-1.903	4.03e-78
NBPF8	ENSG00000270231.3	7.485	30.77	-1.905	1.16e-100
LINC00342	ENSG00000232931.5	1.88	9.79	-1.906	5.25e-107
KNSTRN	ENSG00000128944.13	17.695	69.089	-1.907	3.62e-62
RP11-155O18.6	ENSG00000272100.1	0.52	4.7	-1.907	1.45e-109
MSANTD2	ENSG00000120458.9	6.64	27.729	-1.911	5.98e-134
RP13-104F24.3	ENSG00000265298.1	6.76	28.181	-1.911	2.14e-82
SLC26A4-AS1	ENSG00000233705.6	41.32	158.155	-1.911	6.89e-24
ARHGEF25	ENSG00000240771.6	3.595	16.33	-1.915	1.56e-99
RP3-508I15.19	ENSG00000230149.2	0.53	4.79	-1.92	6.59e-160
GUSBP9	ENSG00000215630.6	2.415	11.96	-1.924	4.4e-98
RP11-1020A11.1	ENSG00000269894.1	0.56	4.92	-1.924	5.73e-122
AC144450.1	ENSG00000228613.1	0	2.8	-1.926	7.64e-102
CYP17A1-AS1	ENSG00000203886.4	0.805	5.86	-1.926	1.4e-145
CTD-3162L10.1	ENSG00000267053.6	2.435	12.06	-1.927	3.53e-95
PHYKPL	ENSG00000175309.14	26.64	104.097	-1.927	9.76e-154
RP11-301L8.2	ENSG00000233110.1	0.16	3.41	-1.927	3.29e-153
CTD-2013N17.6	ENSG00000280332.1	0.49	4.67	-1.928	2.24e-149
SH3D21	ENSG00000214193.9	12.555	50.569	-1.928	3.52e-62
PRKY	ENSG00000099725.14	0	2.81	-1.93	2.23e-52
CTD-2192J16.22	ENSG00000269242.1	2.41	12	-1.931	3.67e-38
RP5-1142A6.9	ENSG00000260121.1	0.55	4.92	-1.933	2.64e-150
AC093838.4	ENSG00000152117.17	6.605	28.089	-1.935	1.24e-131
CES4A	ENSG00000172824.14	7.535	31.65	-1.936	3.61e-73
POM121L9P	ENSG00000128262.8	0.21	3.63	-1.936	1.16e-141
RP11-159D12.2	ENSG00000264112.1	1.98	10.41	-1.937	1.1e-104
RP11-458F8.4	ENSG00000273142.1	2.18	11.18	-1.937	5.09e-115
AC007743.1	ENSG00000233251.7	0.73	5.64	-1.94	1.22e-167
RP11-1319K7.1	ENSG00000179978.11	0.625	5.24	-1.941	4.83e-137
AC093495.4	ENSG00000228242.6	3.1	14.77	-1.943	1.45e-100
RP4-635E18.8	ENSG00000271895.2	5.97	25.919	-1.949	4.61e-113
RP11-710F7.2	ENSG00000250740.1	0.6	5.19	-1.952	2.23e-85
AFG3L1P	ENSG00000223959.8	7.465	31.8	-1.954	2.79e-139
AC010980.2	ENSG00000237732.9	0.21	3.69	-1.955	1.02e-111
RP11-110I1.5	ENSG00000254909.1	0.925	6.47	-1.956	3.86e-84
MAGOH2P	ENSG00000264176.1	0.66	5.45	-1.958	4.08e-167
RP11-680F20.12	ENSG00000264299.1	2.865	14.1	-1.966	4.25e-76
LMNTD2	ENSG00000185522.8	1.8	9.95	-1.967	6.2e-143
PDCL3P4	ENSG00000244119.1	2.62	13.17	-1.969	4.69e-112
AC005104.3	ENSG00000223374.1	0.575	5.17	-1.97	1.85e-133
RAD51-AS1	ENSG00000245849.6	5.885	25.989	-1.971	2.51e-130
RP11-488L18.4	ENSG00000227671.4	13.145	54.5	-1.972	4.41e-91
CTD-2008L17.2	ENSG00000206129.3	0.05	3.13	-1.976	9.47e-167
KLF3-AS1	ENSG00000231160.9	2.78	13.87	-1.976	2.56e-96
TMEM147-AS1	ENSG00000236144.6	6.8	29.699	-1.977	1.84e-126
RP3-368A4.6	ENSG00000271533.1	1.14	7.43	-1.978	8.73e-162
RP11-755F10.3	ENSG00000254461.1	0.27	4.01	-1.98	5.19e-147
RP11-96D1.8	ENSG00000279649.1	0.25	3.93	-1.98	2.56e-169
CCDC180	ENSG00000197816.13	1.795	10.06	-1.984	7.38e-143
RP11-972P1.7	ENSG00000280328.1	0.31	4.19	-1.986	9.99e-157
SNRK-AS1	ENSG00000234617.1	0.23	3.88	-1.988	8.23e-168
NPIPA5	ENSG00000183889.12	54.704	220.173	-1.989	5.21e-114
RP11-192H23.4	ENSG00000258472.8	1.13	7.46	-1.99	9.11e-164
ZFY-AS1	ENSG00000233070.1	0	2.98	-1.993	3.24e-10
RP3-416H24.1	ENSG00000257671.1	3.78	18.06	-1.995	1.84e-95
RP11-574K11.24	ENSG00000279088.1	2.485	12.9	-1.996	1.01e-113
RP11-392E22.10	ENSG00000272934.1	0.08	3.32	-2	1.52e-152
RP11-932O9.9	ENSG00000269930.1	9.35	40.399	-2	3.87e-57
CTD-3092A11.2	ENSG00000270055.1	4.14	19.569	-2.001	1.31e-121
RP11-44M6.7	ENSG00000274272.1	3.21	15.86	-2.002	2.89e-92
AF011889.2	ENSG00000238039.1	0.33	4.35	-2.008	1.2e-101
FAM13A-AS1	ENSG00000248019.2	0.795	6.25	-2.014	1.03e-146
PKD1P6	ENSG00000270580.5	4.625	21.81	-2.02	5.93e-146
AL157871.2	ENSG00000259052.1	22.405	94.039	-2.022	1.57e-40
RP4-669P10.19	ENSG00000227370.1	0.475	5	-2.024	1.69e-145
RP11-258C19.4	ENSG00000227329.2	0	3.07	-2.025	7.14e-34
RP13-104F24.1	ENSG00000266820.1	4.33	20.72	-2.027	1.69e-86
RP11-322E11.5	ENSG00000267583.5	0.27	4.18	-2.028	5.42e-172
RP11-274B21.3	ENSG00000243679.1	8.235	36.691	-2.029	1.91e-116
MROH7-TTC4	ENSG00000271723.5	0.25	4.12	-2.034	1.6e-142
GOLGA2P5	ENSG00000238105.7	4.695	22.371	-2.037	3.19e-131
NPIPB15	ENSG00000196436.8	3.07	15.74	-2.04	9.47e-31
ZSWIM8-AS1	ENSG00000272589.1	0.59	5.55	-2.042	2.5e-138
C8orf88	ENSG00000253250.2	1.28	8.4	-2.044	3.14e-156
RP11-632K20.7	ENSG00000223509.8	3.375	17.04	-2.044	1.94e-121
CTD-2373N4.3	ENSG00000279041.1	0.94	7.06	-2.055	5.34e-136
RP11-867G23.1	ENSG00000254855.1	0.15	3.79	-2.058	5.47e-133
CTC-524C5.2	ENSG00000263272.1	1.6	9.84	-2.06	2.22e-114
CTA-228A9.3	ENSG00000272720.1	0.4	4.85	-2.063	2.23e-147
RP11-43N16.4	ENSG00000279861.1	0.75	6.31	-2.063	2.73e-118
L3HYPDH	ENSG00000126790.11	6.79	31.569	-2.064	7.41e-137
AF131216.5	ENSG00000255020.1	0.51	5.32	-2.065	1.03e-48
ZNF767P	ENSG00000133624.13	5.985	28.259	-2.067	1.68e-142
LINC00174	ENSG00000179406.6	2.015	11.7	-2.075	1.17e-142
UBE2Q2P1	ENSG00000189136.8	2.045	11.85	-2.077	7.78e-108
NPIPP1	ENSG00000188599.17	8.65	39.741	-2.078	1.42e-141
RMST	ENSG00000255794.6	60.61	259.087	-2.078	7.38e-55
SPX	ENSG00000134548.9	2.385	13.3	-2.079	1.05e-52
ACKR1	ENSG00000213088.9	7.145	33.529	-2.084	1.08e-58
ZNF37BP	ENSG00000234420.7	1.88	11.21	-2.084	2.08e-158
RP11-504P24.8	ENSG00000272645.2	4	20.24	-2.087	4.02e-118
L3MBTL1	ENSG00000185513.14	3.845	19.601	-2.088	4.5e-128
MMP25-AS1	ENSG00000261971.6	3.635	18.74	-2.09	7.61e-126
RP11-802E16.3	ENSG00000255031.5	2.05	12.05	-2.097	1.57e-104
SDHAP1	ENSG00000185485.14	10.15	46.782	-2.099	4.98e-160
CTD-3184A7.4	ENSG00000232442.1	15.615	70.292	-2.101	2.82e-110
RP11-242D8.3	ENSG00000267340.1	0	3.29	-2.101	2.67e-68
PNISR	ENSG00000132424.14	47.935	209.76	-2.107	3.42e-122
SNORD97	ENSG00000238622.1	0	3.31	-2.108	0.000191
PPT2-EGFL8	ENSG00000258388.7	1.05	7.87	-2.113	3.21e-139
RP11-362F19.1	ENSG00000248810.1	0.475	5.39	-2.115	1.1e-158
TMEM178A	ENSG00000152154.10	2.195	12.84	-2.115	1.52e-120
RP11-190A12.8	ENSG00000272668.1	2.285	13.26	-2.118	2.89e-79
TMEM255B	ENSG00000184497.12	5.34	26.629	-2.124	2.47e-85
ANKRD10-IT1	ENSG00000229152.2	2.845	15.78	-2.126	2.06e-106
TNS2	ENSG00000111077.17	47.385	210.138	-2.126	2.52e-127
RP11-106M3.2	ENSG00000260729.1	0.28	4.61	-2.132	1.01e-150
RP3-402G11.27	ENSG00000272836.1	0.78	6.81	-2.133	2e-173
RP5-855D21.3	ENSG00000272812.1	0.98	7.7	-2.135	1.69e-128
RP3-331H24.7	ENSG00000279312.1	2.465	14.28	-2.141	1.25e-138
RP3-402G11.28	ENSG00000273137.1	1.05	8.06	-2.144	1.95e-162
CYP2D7	ENSG00000205702.10	1.195	8.72	-2.147	7.9e-100
RP11-392E22.5	ENSG00000250989.1	0.13	4.01	-2.149	6.22e-96
AC009120.6	ENSG00000259972.2	5.575	28.21	-2.151	6.76e-119
GUSBP11	ENSG00000228315.11	9.065	43.901	-2.157	9.52e-74
RP11-894P9.1	ENSG00000246451.2	0.865	7.32	-2.157	1.23e-140
RN7SL608P	ENSG00000239884.3	0.84	7.22	-2.159	1.71e-116
CTD-3220F14.1	ENSG00000267605.5	1.185	8.77	-2.161	3.28e-123
AP000347.4	ENSG00000234353.2	2.07	12.75	-2.163	4.98e-87
AC005519.4	ENSG00000258559.2	0.66	6.47	-2.17	3.46e-140
ACTA2-AS1	ENSG00000180139.11	0.335	5.02	-2.173	2.06e-94
AC132217.4	ENSG00000240801.1	4.515	23.9	-2.175	1.02e-42
FAM229A	ENSG00000225828.1	2.45	14.66	-2.182	7.83e-115
AC073464.7	ENSG00000232502.1	0.11	4.04	-2.183	4.45e-121
RP4-622L5.7	ENSG00000224066.1	0.44	5.55	-2.185	7.39e-101
CTD-2270P14.1	ENSG00000260565.6	3.17	18.08	-2.194	1.31e-156
NEAT1	ENSG00000245532.5	688.708	3157.57	-2.195	4.41e-78
CSNK2B-LY6G5B-1181	ENSG00000263020.5	1.08	8.56	-2.2	2.03e-121
LA16c-390E6.4	ENSG00000260051.1	0.4	5.44	-2.202	1.14e-133
CLASRP	ENSG00000104859.14	27.33	129.444	-2.203	3.22e-134
FAAHP1	ENSG00000232022.6	0.92	7.85	-2.205	3.65e-140
IZUMO4	ENSG00000099840.13	1.635	11.17	-2.207	2.67e-123
ZDHHC11B	ENSG00000206077.10	0.78	7.22	-2.207	1.36e-158
MT2P1	ENSG00000162840.4	0	3.63	-2.211	2.79e-52
TPTE2P1	ENSG00000253771.5	0.53	6.16	-2.226	1.32e-95
NPIPA1	ENSG00000183426.15	31.875	153.404	-2.232	1.15e-129
RP11-958N24.1	ENSG00000183458.13	2.865	17.22	-2.237	3.9e-120
HNRNPU-AS1	ENSG00000188206.6	5.75	30.849	-2.238	3.83e-104
HERC2P9	ENSG00000206149.10	6.86	36.201	-2.243	9.26e-147
AC093110.3	ENSG00000238018.2	0.26	4.98	-2.247	3.07e-153
RP11-631N16.4	ENSG00000275180.1	9.55	49.09	-2.247	2.52e-72
GALNT15	ENSG00000131386.17	1.68	11.77	-2.252	2.28e-76
MIR4697HG	ENSG00000280237.1	1.22	9.66	-2.264	2.57e-179
RP13-895J2.3	ENSG00000256542.2	0.12	4.39	-2.267	3.43e-171
SLX1B-SULT1A4	ENSG00000260280.5	1.235	9.77	-2.269	1.34e-143
HERC2P3	ENSG00000180229.12	3.695	21.67	-2.272	6.95e-102
FAM95B1	ENSG00000223839.7	0.45	6.02	-2.275	1.57e-142
RP11-268J15.5	ENSG00000116883.8	5.12	28.64	-2.276	5.62e-65
CTD-2545G14.4	ENSG00000279812.1	0	3.85	-2.278	5.85e-09
RP11-423H2.3	ENSG00000249684.5	1.36	10.46	-2.28	1.49e-99
RP11-295P9.3	ENSG00000239665.8	7.58	40.74	-2.282	7.63e-139
RP11-793H13.10	ENSG00000267281.2	0.875	8.13	-2.284	1.05e-147
UVSSA	ENSG00000163945.15	2.71	17.08	-2.285	7.99e-138
HOTAIRM1	ENSG00000233429.9	1.23	9.88	-2.287	8.14e-110
RP5-966M1.6	ENSG00000243696.4	0.39	5.79	-2.288	1.88e-150
COX7CP1	ENSG00000235957.1	0.485	6.28	-2.293	4.28e-72
GOLGA8R	ENSG00000186399.10	1.645	11.97	-2.294	9.83e-106
GOLGA8Q	ENSG00000178115.11	0.53	6.53	-2.299	2.71e-101
RRN3P1	ENSG00000248124.7	5.57	31.33	-2.299	5.76e-135
RP11-69E11.4	ENSG00000182109.7	5.42	30.619	-2.3	6.1e-109
RP11-1376P16.2	ENSG00000265678.1	0.615	6.96	-2.301	1.66e-158
AC114730.11	ENSG00000235351.1	0.4	5.92	-2.305	1.87e-133
SNORA70	ENSG00000207165.1	0	3.96	-2.31	6.39e-19
PKD1P6	ENSG00000250251.6	4.225	24.931	-2.311	5.87e-140
PI4KAP2	ENSG00000183506.16	6.785	38.051	-2.327	1.97e-139
AP000892.6	ENSG00000280143.1	1.62	12.2	-2.333	1.73e-125
BRICD5	ENSG00000182685.7	6.185	35.24	-2.335	7.18e-84
RP13-104F24.2	ENSG00000215769.8	3.16	20.069	-2.341	1.56e-108
RP4-631H13.6	ENSG00000230953.2	0.87	8.5	-2.345	8.74e-65
AGAP9	ENSG00000204172.11	3.05	19.62	-2.348	3.23e-119
LINC01002	ENSG00000282508.1	12.475	67.62	-2.348	3.27e-100
RP11-61I13.3	ENSG00000235033.7	0.55	6.93	-2.355	5.92e-147
RP11-927P21.5	ENSG00000263647.1	3.155	20.26	-2.355	8.36e-96
LINC01140	ENSG00000267272.5	0.99	9.2	-2.358	1.16e-155
RP11-182J1.12	ENSG00000259244.1	1.365	11.13	-2.359	2.18e-116
AC018766.4	ENSG00000267896.1	3.17	20.46	-2.364	4.08e-125
MALAT1	ENSG00000251562.7	136.659	707.506	-2.364	1.1e-97
RP11-66N24.4	ENSG00000157306.14	1.325	10.98	-2.365	6.75e-159
PDXDC2P	ENSG00000196696.12	4.775	28.879	-2.371	1e-134
WASH7P	ENSG00000227232.5	3.4	21.85	-2.377	4.27e-135
RP11-419C5.2	ENSG00000226232.8	2.985	19.71	-2.378	5.51e-105
GOLGA8N	ENSG00000232653.8	7.565	43.822	-2.388	5.96e-99
ENTHD2	ENSG00000167302.9	10.19	57.791	-2.393	7.89e-137
NSUN5P1	ENSG00000223705.9	13.96	77.578	-2.393	7.34e-109
RP4-669L17.10	ENSG00000237094.11	8.255	47.722	-2.396	1.68e-110
RP11-34P13.16	ENSG00000269981.1	1.955	14.61	-2.401	9.37e-76
RP3-508I15.21	ENSG00000272669.1	3.22	21.29	-2.401	4.45e-147
RP11-575L7.8	ENSG00000235298.1	1.55	12.51	-2.405	4.76e-103
CMAHP	ENSG00000168405.14	13.405	75.53	-2.409	1.26e-115
ADGRG3	ENSG00000182885.16	0.17	5.22	-2.41	3.21e-141
RP1-59D14.5	ENSG00000263345.1	0.56	7.33	-2.417	2.22e-142
LINC01089	ENSG00000212694.8	13.21	74.982	-2.419	3.97e-105
RP11-147I3.1	ENSG00000241170.2	0.66	7.9	-2.423	4.69e-168
uc_338	ENSG00000274051.1	0	4.41	-2.436	5.03e-78
RTEL1-TNFRSF6B	ENSG00000026036.20	2.02	15.38	-2.439	4.83e-142
ADIRF-AS1	ENSG00000272734.1	3.995	26.119	-2.441	4.3e-102
LINC00106	ENSG00000236871.6	0.975	9.88	-2.462	7.65e-125
AC068138.1	ENSG00000235070.3	0.47	7.12	-2.466	1.14e-81
RP11-347I19.8	ENSG00000272849.1	0.99	10.07	-2.476	1.98e-147
DNAAF1	ENSG00000154099.17	0.865	9.41	-2.481	3.53e-139
RP11-415J8.3	ENSG00000225313.5	1.34	12.1	-2.485	1.93e-139
PKD1P1	ENSG00000244257.5	0.93	9.83	-2.488	1.46e-88
LINC01125	ENSG00000228486.9	3.945	26.77	-2.489	1.15e-123
GOLGA6L5P	ENSG00000230373.8	3.09	21.989	-2.491	3.07e-119
AC138035.2	ENSG00000238035.8	1.93	15.5	-2.494	2.7e-138
ADCY10P1	ENSG00000161912.17	0.97	10.13	-2.498	8.1e-144
ASIC3	ENSG00000213199.7	0.5	7.49	-2.501	9.85e-154
SNRPGP15	ENSG00000224543.4	0.815	9.31	-2.506	2.92e-103
RP11-347C12.1	ENSG00000198064.13	0.96	10.17	-2.511	3.64e-154
AC024560.3	ENSG00000214135.8	5.26	34.741	-2.513	3.43e-157
AC007326.1	ENSG00000279560.1	1.13	11.21	-2.519	3.4e-110
NPIPB3	ENSG00000169246.16	18.08	109.599	-2.535	6.09e-118
PWRN1	ENSG00000259905.5	0.985	10.51	-2.536	1.63e-80
RP11-449J21.3	ENSG00000279382.1	2.71	20.53	-2.537	5.27e-119
RUSC1-AS1	ENSG00000225855.6	1.625	14.3	-2.543	5.57e-172
LINC00969	ENSG00000242086.8	18.48	114.872	-2.572	2.03e-162
RMST_10	ENSG00000277081.1	40.839	249.534	-2.582	3.54e-52
TMEM198B	ENSG00000182796.12	8.645	56.751	-2.582	3.4e-183
SLX1A-SULT1A3	ENSG00000213599.9	3.04	23.29	-2.588	3.34e-141
RP11-5A19.5	ENSG00000265690.7	0.625	8.78	-2.589	5.23e-134
RP11-115H13.1	ENSG00000273906.1	0	5.07	-2.602	3.16e-18
RP11-734K23.9	ENSG00000277701.4	1.87	16.44	-2.603	1.05e-79
RP11-616M22.1	ENSG00000260403.1	0.09	5.79	-2.639	6.4e-146
RP13-20L14.1	ENSG00000260011.2	0.13	6.04	-2.639	8.76e-143
RP5-1024C24.1	ENSG00000254489.1	0.1	5.92	-2.653	8.36e-146
RP11-677O4.6	ENSG00000267143.1	0	5.3	-2.655	5.61e-92
WASH5P	ENSG00000282458.1	10.86	73.699	-2.655	2.92e-144
SNRPGP10	ENSG00000235363.1	1.995	17.93	-2.66	5.07e-118
SAP25	ENSG00000205307.10	1.52	14.96	-2.663	7.01e-89
LINC00894	ENSG00000235703.5	1.64	15.97	-2.684	5.26e-128
RP11-1212A22.1	ENSG00000205746.9	5.135	38.489	-2.686	7.59e-125
RP11-616M22.2	ENSG00000259910.1	0.07	5.9	-2.689	7.81e-167
USP32P1	ENSG00000188933.14	1	11.96	-2.696	6.49e-33
RP11-175B9.3	ENSG00000236439.4	2.42	21.36	-2.709	1.44e-122
HERC2P2	ENSG00000276550.4	7.86	57.13	-2.714	2.35e-107
RP11-228B15.4	ENSG00000225032.5	1.685	16.731	-2.723	1.66e-145
CTD-2228K2.7	ENSG00000225138.7	6.875	51.61	-2.74	2.49e-106
PLA2G4B	ENSG00000243708.8	3.02	26.099	-2.753	6.61e-116
RP4-800G7.2	ENSG00000244560.6	2.26	20.97	-2.753	1.14e-125
STAG3L5P-PVRIG2P-PILRB	ENSG00000272752.5	20.725	146.422	-2.763	7.67e-121
PI4KAP1	ENSG00000274602.4	4.77	38.781	-2.785	1.22e-97
RP13-516M14.10	ENSG00000275888.1	0.65	10.4	-2.789	2.44e-149
RP11-286H15.1	ENSG00000272789.1	0.43	9.18	-2.832	4.96e-123
ADGRV1	ENSG00000164199.15	0.56	10.48	-2.879	2.27e-147
AC093642.3	ENSG00000237940.3	0.75	11.88	-2.88	4.37e-156
PTOV1-AS2	ENSG00000269352.1	4.775	42.869	-2.925	7.69e-132
RP11-66N24.3	ENSG00000258727.1	1.475	18.191	-2.955	1.76e-163
RNA5SP216	ENSG00000251920.1	0	6.87	-2.976	2.31e-41
KIAA1456	ENSG00000250305.8	6.98	61.849	-2.977	1.26e-179
NPIPB4	ENSG00000185864.16	10.015	85.882	-2.98	1.08e-139
GOLGA8M	ENSG00000188626.6	1.415	18.15	-2.987	5.65e-110
RP11-1055B8.4	ENSG00000262877.4	2.685	28.381	-2.995	2.01e-103
CTD-2517M22.14	ENSG00000255182.2	0.89	14.23	-3.01	1.27e-151
RP11-231C14.4	ENSG00000169203.16	11.24	97.612	-3.01	8e-128
C11orf96	ENSG00000187479.5	8.22	73.699	-3.018	2.22e-98
MYO15B	ENSG00000266714.6	30.475	255.096	-3.024	2.84e-121
RP11-188P20.3	ENSG00000271941.1	1.06	15.83	-3.03	1.73e-183
RP11-394O4.5	ENSG00000269936.3	0.96	15.43	-3.067	2.44e-110
STAG3L5P	ENSG00000242294.6	7.98	74.91	-3.08	5.9e-132
RP11-496I9.1	ENSG00000254815.5	0.765	14.03	-3.09	2.35e-135
MROH7	ENSG00000184313.19	1.505	20.5	-3.101	1.18e-156
AC006128.2	ENSG00000279716.1	2.43	28.939	-3.126	2.76e-122
SH3BP5-AS1	ENSG00000224660.1	3.37	38.43	-3.174	1.98e-166
LINC00982	ENSG00000177133.10	5.385	56.751	-3.177	6.25e-151
CTD-2537I9.12	ENSG00000267523.1	2.445	30.83	-3.208	6.98e-132
CTB-79E8.3	ENSG00000253683.1	0	8.32	-3.22	9.43e-100
PAX8-AS1	ENSG00000189223.13	4.15	47.179	-3.226	4.88e-148
ASMTL-AS1	ENSG00000236017.7	4.345	49.71	-3.246	5.61e-115
RP11-65I12.1	ENSG00000274877.1	5.335	60.698	-3.284	1.13e-131
NPIPB5	ENSG00000243716.10	24.21	248.481	-3.307	8.05e-150
LINC00893	ENSG00000241769.7	4	49.35	-3.332	2.37e-139
TTTY14	ENSG00000176728.7	0	9.56	-3.401	1.53e-22
STX16-NPEPL1	ENSG00000254995.4	0.93	19.54	-3.412	1.01e-151
RP11-326C3.2	ENSG00000255026.1	2.65	43.149	-3.597	8.43e-81
RP4-555D20.1	ENSG00000280435.1	1.64	37.66	-3.872	5.37e-166
FAM95C	ENSG00000273036.2	1.08	30.619	-3.926	2.72e-193
RP11-632K20.8	ENSG00000270789.1	0	14.52	-3.956	1.26e-34
CTD-2545M3.8	ENSG00000268518.1	1.22	33.831	-3.972	6.52e-86
RP4-555D20.2	ENSG00000261786.1	3.17	66.879	-4.025	9.05e-168
DIO3OS	ENSG00000258498.6	0.14	19.14	-4.143	1.96e-190
AL442127.1	ENSG00000278371.2	0	16.979	-4.168	5.64e-42
MEG3	ENSG00000214548.14	0.51	26.72	-4.198	1.25e-131
TXLNGY	ENSG00000131002.11	0	21.51	-4.492	9.17e-37
